# Supplementary material for: Synthesis, characterization, and electronic structures of a methyl germyliumylidene ion and germylone-group VI metal complexes
Source: Royal Society of Chemistry journal article supplement (doi:10.1039/c5cc08665e), 2015-10-29
Supplement: c5cc08665e1.pdf [file c5cc08665e1.pdf]

# Synthesis, Characterization, and Electronic Structures of a Methyl Germyliumylidene Ion and Germylone-Group VI Metal Complexes

Bochao Su,<sup>†</sup> Rakesh Ganguly,<sup>‡</sup> Yongxin Li<sup>†</sup> and Rei Kinjo<sup>†</sup>

<sup>†</sup> *Division of Chemistry and Biological Chemistry (CBC), School of Physical and  
Mathematical Sciences, Nanyang Technological University (NTU) and*

<sup>‡</sup> *NTU-CBC Crystallography Facility,  
Singapore 637371, Singapore*

## Supporting Information

### Contents

1. Synthesis of compounds **2–5** and their spectral data
2. Crystal structural parameters
3. UV-Vis Spectra
4. IR spectra
5. Theoretical calculation
6. References

## 1. Synthesis of compounds 2–5 and their spectral data

**General considerations:** All reactions were performed under an atmosphere of argon or nitrogen by using standard Schlenk or dry box techniques; solvents were dried over Na metal, K metal or CaH<sub>2</sub>. Reagents were of analytical grade, obtained from commercial suppliers and used without further purification. <sup>1</sup>H and <sup>13</sup>C NMR spectra were obtained with a Bruker AVIII 400MHz BBFO1 spectrometer at 298 K unless otherwise stated. NMR multiplicities are abbreviated as follows: s = singlet, d = doublet, t = triplet, m = multiplet, br = broad signal. Coupling constants *J* are given in Hz. Electrospray ionization (ESI) mass spectra were obtained at the Mass Spectrometry Laboratory at the Division of Chemistry and Biological Chemistry, Nanyang Technological University. Melting points were measured with a OpticMelt Stanford Research System. IR spectra were measured with the Bruker Alpha-FT-IR Spectrometer with an ECO-ATR module. UV-Vis spectra were measured with Cary 100 Bio UV-Visible spectrophotometer. Compound **1** was synthesized following the reported procedure.<sup>[S1]</sup>

**Compound 2:** MeOTf (25 mg, 0.152 mmol) was added to a toluene solution of compound **1** (70 mg, 0.148 mmol) at room temperature. After 1 h with stirring, the solvent was removed under vacuum, and the residue was washed with hexane (3 × 2 mL) to afford **2** as red solid (65%). Single crystals suitable for X-ray diffraction analysis were obtained by recrystallization from a saturated toluene solution of **2** at room temperature.

M.p.: 65 °C (decomposed);  $^1\text{H}$  NMR ( $\text{C}_6\text{D}_6$ , 400 MHz, 298 K):  $\delta$  6.57 (s, 1H, Ar), 6.55 (s, 1H, Ar), 5.00–4.93 (m, 1H,  $\text{NCH}_2$ ), 4.86–4.79 (m, 1H,  $\text{NCH}_2$ ), 4.70–4.61 (m, 1H,  $\text{NCH}_2$ ), 4.31–4.23 (m, 1H,  $\text{NCH}_2$ ), 2.24 (s, 3H, Ar- $\text{CH}_3$ ), 2.08 (s, 3H, Ar- $\text{CH}_3$ ), 2.01–1.99 (m, 6H, Ar- $\text{CH}_3$  & Ad- $\text{CH}$ ), 1.93–1.86 (m, 6H, Ad- $\text{CH}_2$ ), 1.41 (d,  $J = 12.7$  Hz, 3H, Ad- $\text{CH}_2$ ), 1.35 (d,  $J = 12.1$  Hz, 3H, Ad- $\text{CH}_2$ ), 1.12 (s, 9H,  $\text{C}(\text{CH}_3)_3$ ), 0.77 (s, 3H, Ge- $\text{CH}_3$ );  $^{13}\text{C}\{^1\text{H}\}$  NMR ( $\text{C}_6\text{D}_6$ , 100 MHz, 298 K):  $\delta$  206.0 ( $\text{C}_{\text{carbene}}$ ), 165.7 ( $\text{C}=\text{N}$ ), 137.2 ( $\text{C}_{\text{Ar}}$ ), 135.9 ( $\text{C}_{\text{Ar}}$ ), 131.5 ( $\text{C}_{\text{Ar}}$ ), 130.6 ( $\text{C}_{\text{Ar}}$ ), 129.0 ( $\text{C}_{\text{ArH}}$ ), 128.8 ( $\text{C}_{\text{ArH}}$ ), 58.7 (Ad- $q$ ), 50.4 ( $\text{NCH}_2$ ), 49.3 ( $\text{NCH}_2$ ), 40.1 (Ad- $\text{CH}_2$ ), 39.2 ( $\text{C}(\text{CH}_3)_3$ ), 34.9 (Ad- $\text{CH}_2$ ), 28.8 (Ad- $\text{CH}$ ), 27.8 ( $\text{C}(\text{CH}_3)_3$ ), 20.0 (Ar- $\text{CH}_3$ ), 18.9 (Ar- $\text{CH}_3$ ), 18.3 (Ar- $\text{CH}_3$ ), 6.7 (Ge- $\text{CH}_3$ ), The signal for  $\text{CF}_3$  could not be detected, presumably due to an overlap with other peaks;  $^{19}\text{F}$  NMR (376 MHz,  $\text{CDCl}_3$ ):  $\delta$  -77.6. HRMS (ESI):  $m/z$  calcd for  $\text{C}_{28}\text{H}_{42}\text{GeN}_3$ : 494.2591 [ $(\text{M}-\text{OTf})$ ] $^+$ ; found: 494.2585.

### General procedure for the synthesis of compound 3–5.

The respective  $\text{M}(\text{CO})_5(\text{thf})$  ( $\text{M} = \text{Cr}, \text{Mo}, \text{W}$ ) was prepared by UV-irradiation of the corresponding  $\text{M}(\text{CO})_6$  in THF.<sup>[S2]</sup> A THF solution of the freshly prepared  $\text{M}(\text{CO})_5(\text{thf})$  was added dropwise to a THF solution of compound **1** at room temperature. After 2 hours, the resulting solution was concentrated under reduced pressure and stored at -26 °C to afford red crystals. Compound **3–5** are thermally stable in THF, benzene and toluene solvents, and even under heating condition at 80 °C for several hours, no decomposition was detected. However, they rapidly decompose upon exposure to air.

**Compound 3:** Quantity used: Cr(CO)<sub>6</sub> (46 mg, 0.210 mmol), compound **1** (100 mg, 0.209 mmol), THF (15 mL); yield (40 %). M.p.:92 °C (decomposed); <sup>1</sup>H NMR (C<sub>6</sub>D<sub>6</sub>, 400 MHz, 298 K): δ 6.78 (s, 2H, Ar), 3.50 (t, *J* = 7.3 Hz, 2H, NCH<sub>2</sub>), 2.99 (t, *J* = 7.3 Hz, 2H, NCH<sub>2</sub>), 2.13 (m, 12H, Ar-CH<sub>3</sub> & Ad-CH), 2.03 (m, 6H, Ad-CH<sub>2</sub>), 1.75 (d, *J* = 11.9 Hz, 3H, Ad-CH<sub>2</sub>), 1.62 (d, *J* = 12.1 Hz, 3H, Ad-CH<sub>2</sub>), 0.77 (s, 9H, C(CH<sub>3</sub>)<sub>3</sub>); <sup>13</sup>C{<sup>1</sup>H} NMR (C<sub>6</sub>D<sub>6</sub>, 100 MHz, 298 K): 225.9 (CO), 218.6 (CO), 195.5 (C<sub>carbene</sub>), 145.1 (C=N), 140.2 (C<sub>Ar</sub>), 136.8 (C<sub>Ar</sub>), 133.9 (C<sub>Ar</sub>), 129.7 (C<sub>Ar</sub>H), 54.7 (Ad-*q*), 49.9 (NCH<sub>2</sub>), 46.8 (NCH<sub>2</sub>), 39.7 (Ad-CH<sub>2</sub>), 38.6 (C(CH<sub>3</sub>)<sub>3</sub>), 36.7 (Ad-CH<sub>2</sub>), 29.8 (Ad-CH), 29.1 (C(CH<sub>3</sub>)<sub>3</sub>), 21.0 (Ar-CH<sub>3</sub>), 19.0 (Ar-CH<sub>3</sub>); IR ν/cm<sup>-1</sup> (solid): 2048 (s), 1976 (m), 1917 (s), 1899 (s); UV-Vis (ε, in THF): λ = 402 nm (10800), 465 nm (8950); HRMS (ESI): *m/z* calcd for C<sub>32</sub>H<sub>40</sub>CrGeN<sub>3</sub>O<sub>5</sub>: 672.1585 [(*M+H*)]<sup>+</sup>; found: 672.1594.

**Compound 4:** Quantity used: Mo(CO)<sub>6</sub> (56 mg, 0.210 mmol), compound **1** (100 mg, 0.209 mmol), THF (15 mL); yield (36 %). M.p.:95 °C (decomposed); <sup>1</sup>H NMR (C<sub>6</sub>D<sub>6</sub>, 400 MHz, 298 K): δ 6.79 (s, 2H, Ar), 3.53 (t, *J* = 7.3 Hz, 2H, NCH<sub>2</sub>), 2.99 (t, *J* = 7.3 Hz, 2H, NCH<sub>2</sub>), 2.15 (m, 6H, Ar-CH<sub>3</sub> & Ad-CH), 2.12 (s, 6H, Ar-CH<sub>3</sub>), 2.05 (m, 6H, Ad-CH<sub>2</sub>), 1.75 (d, *J* = 11.9 Hz, 3H, Ad-CH<sub>2</sub>), 1.63 (d, *J* = 12.1 Hz, 3H, Ad-CH<sub>2</sub>), 0.77 (s, 9H, C(CH<sub>3</sub>)<sub>3</sub>); <sup>13</sup>C{<sup>1</sup>H} NMR (C<sub>6</sub>D<sub>6</sub>, 100 MHz, 298 K): 213.7 (CO), 206.7 (CO), 190.9 (C<sub>carbene</sub>), 143.6 (C=N), 140.6 (C<sub>Ar</sub>), 136.7 (C<sub>Ar</sub>), 133.7 (C<sub>Ar</sub>), 129.7 (C<sub>Ar</sub>H), 54.5 (Ad-*q*), 49.9 (NCH<sub>2</sub>), 46.9 (NCH<sub>2</sub>), 39.6 (Ad-CH<sub>2</sub>), 38.3 (C(CH<sub>3</sub>)<sub>3</sub>), 36.7 (Ad-CH<sub>2</sub>), 29.8 (Ad-CH), 29.1 (C(CH<sub>3</sub>)<sub>3</sub>), 21.0 (Ar-CH<sub>3</sub>), 18.9 (Ar-CH<sub>3</sub>); IR ν/cm<sup>-1</sup> (solid): 2061 (s), 1985 (m), 1923 (s), 1897 (s); UV-Vis (ε, in THF): λ = 327 nm

(15700), 430 nm (11100); HRMS (ESI):  $m/z$  calcd for  $C_{32}H_{40}MoGeN_3O_5$ : 718.1234  
[[ $M+H$ ]]<sup>+</sup>; found: 718.1251.

**Compound 5:** Quantity used:  $W(CO)_6$  (73 mg, 0.208 mmol), compound **1** (100 mg, 0.209 mmol), THF (15 mL); yield (32 %). M.p.: 105 °C (decomposed);  $^1H$  NMR ( $C_6D_6$ , 400 MHz, 298 K):  $\delta$  6.78 (s, 2H, Ar), 3.51 (t,  $J = 7.3$  Hz, 2H,  $NCH_2$ ), 2.99 (t,  $J = 7.3$  Hz, 2H,  $NCH_2$ ), 2.15 (m, 6H, Ar- $CH_3$  & Ad- $CH$ ), 2.11 (s, 6H, Ar- $CH_3$ ), 2.05 (m, 6H, Ad- $CH_2$ ), 1.75 (d,  $J = 11.9$  Hz, 3H, Ad- $CH_2$ ), 1.63 (d,  $J = 12.2$  Hz, 3H, Ad- $CH_2$ ), 0.76 (s, 9H,  $C(CH_3)_3$ );  $^{13}C\{^1H\}$  NMR ( $C_6D_6$ , 100 MHz, 298 K): 201.9 (CO), 197.5 (CO), 188.0 ( $C_{carbene}$ ), 143.7 ( $C=N$ ), 140.4 ( $C_{Ar}$ ), 136.8 ( $C_{Ar}$ ), 133.8 ( $C_{Ar}$ ), 129.7 ( $C_{ArH}$ ), 54.5 (Ad- $q$ ), 49.9 ( $NCH_2$ ), 47.0 ( $NCH_2$ ), 39.7 (Ad- $CH_2$ ), 38.3 ( $C(CH_3)_3$ ), 36.7 (Ad- $CH_2$ ), 29.8 (Ad- $CH$ ), 29.1 ( $C(CH_3)_3$ ), 21.0 (Ar- $CH_3$ ), 19.0 (Ar- $CH_3$ ); IR  $\nu/cm^{-1}$  (solid): 2059 (s), 1978 (m), 1917 (s), 1895 (s); UV-Vis ( $\epsilon$ , in THF):  $\lambda = 328$  nm (13300), 434 nm (8910); HRMS (ESI):  $m/z$  calcd for  $C_{32}H_{40}WGeN_3O_5$ : 804.1689  
[[ $M+H$ ]]<sup>+</sup>; found: 804.1710.

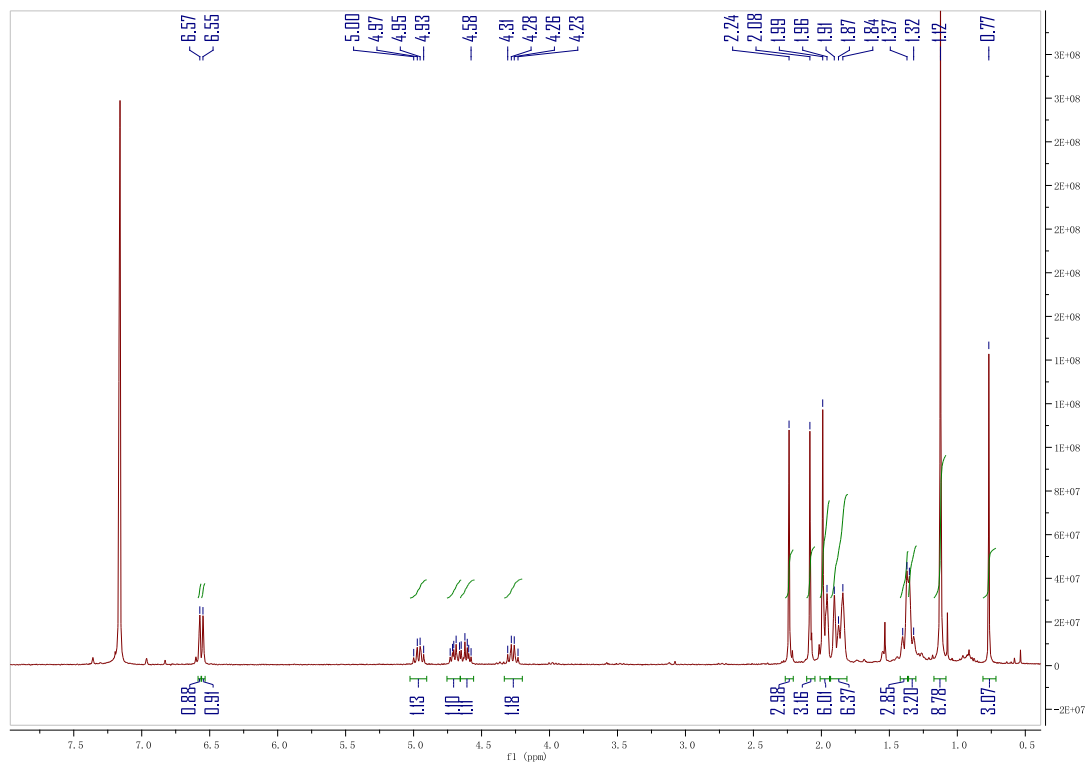

**Figure S1:**  $^1\text{H}$  NMR spectrum of **2**.

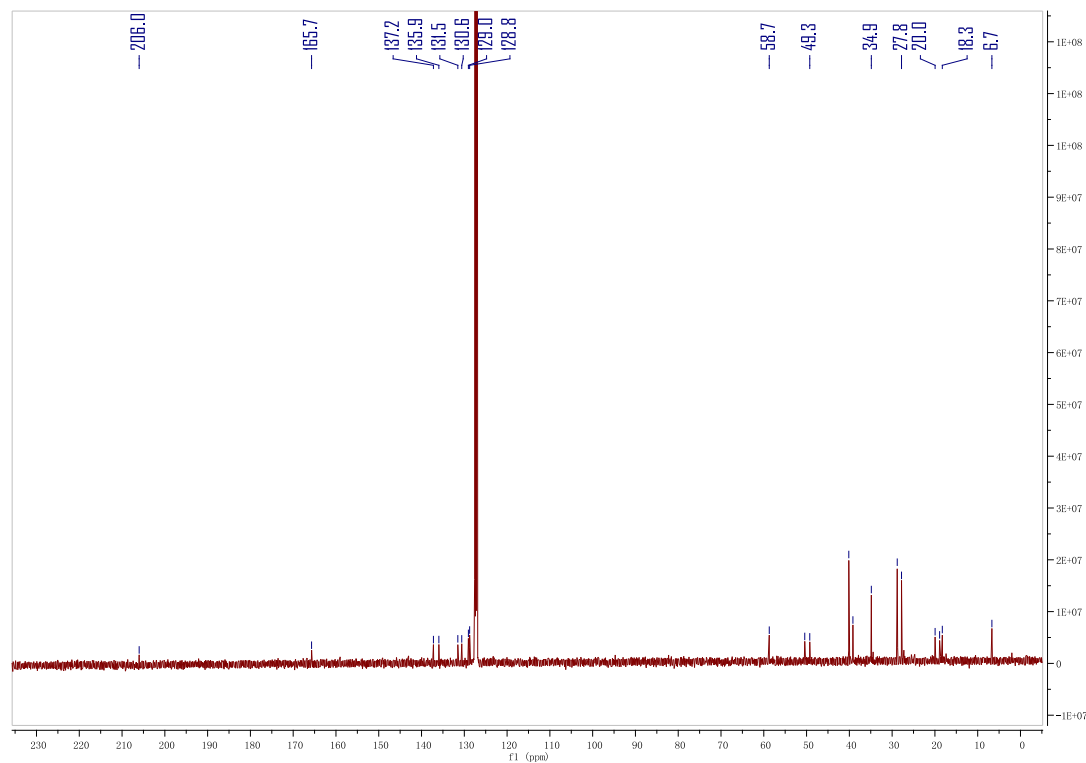

**Figure S2:**  $^{13}\text{C}$  NMR spectrum of **2**.

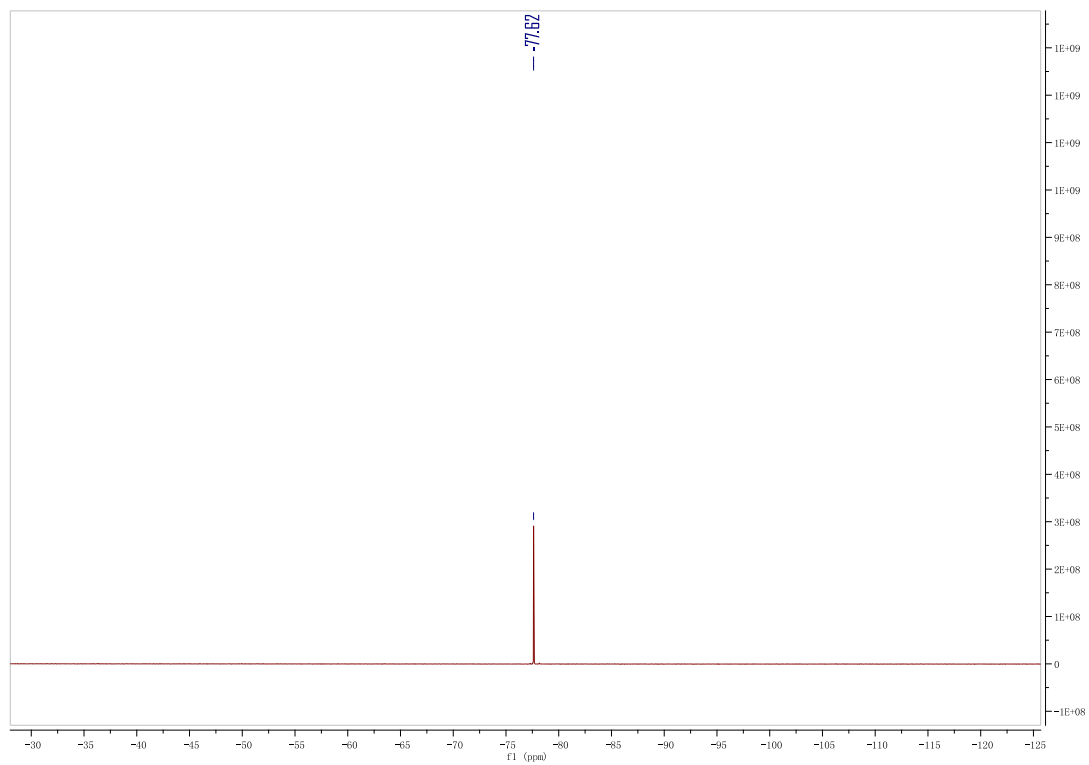

**Figure S3:**  $^{19}\text{F}$  NMR spectrum of **2**.

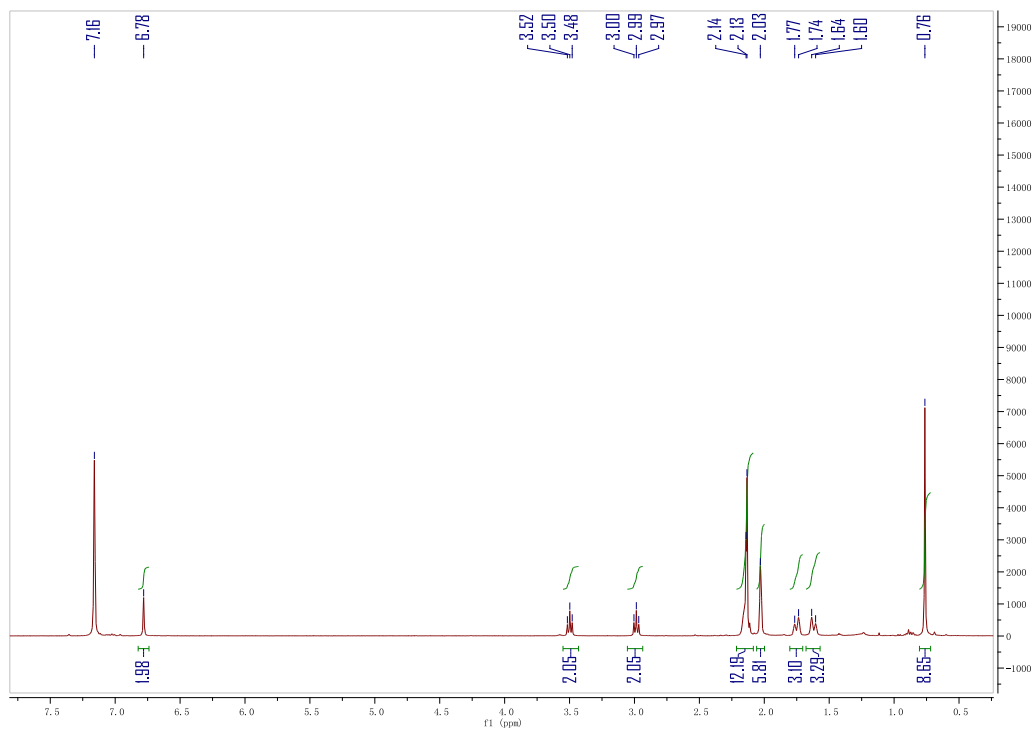

Figure S4:  $^1\text{H}$  NMR spectrum of **3**.

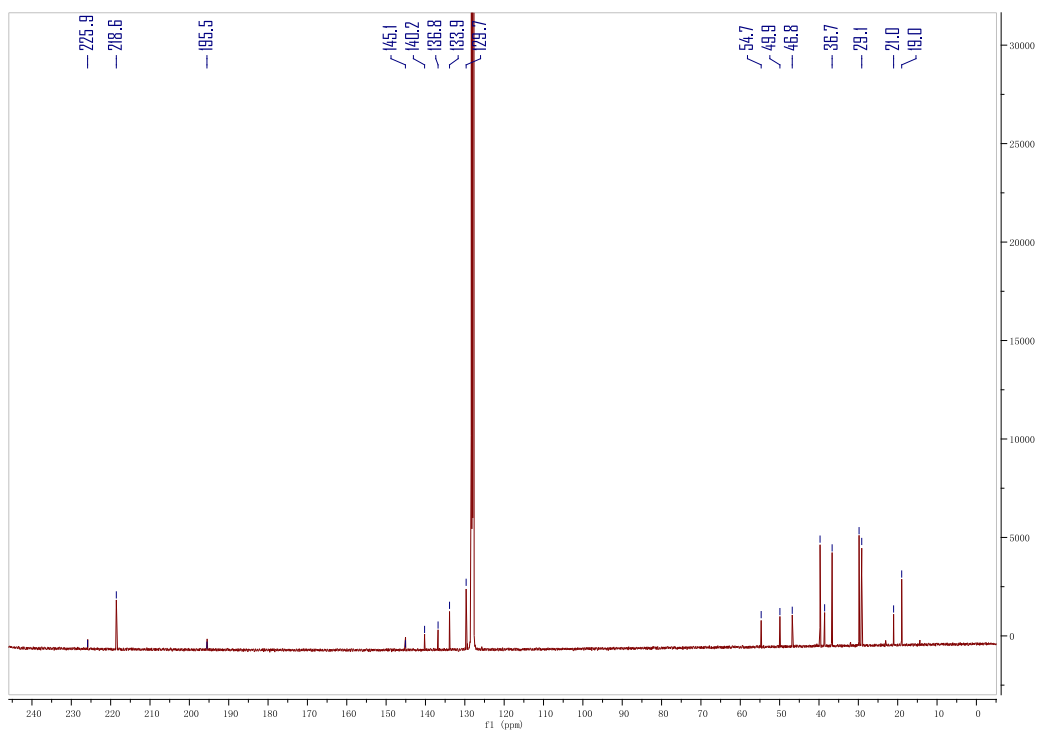

Figure S5:  $^{13}\text{C}$  NMR spectrum of **3**.



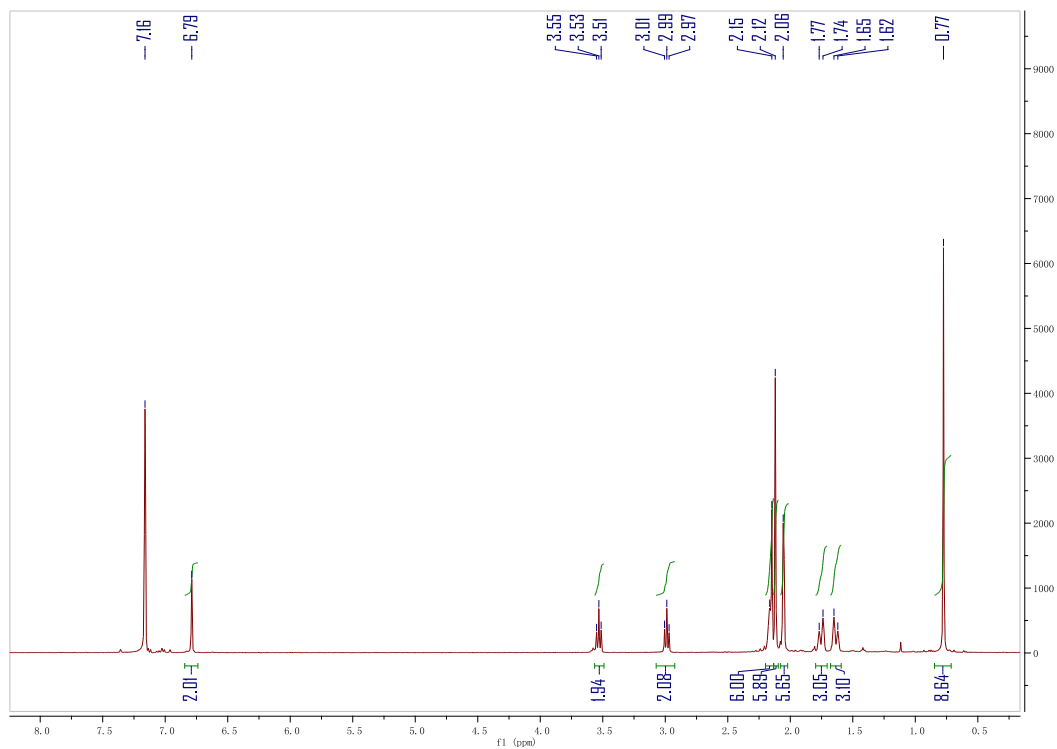

**Figure S6:**  $^1\text{H}$  NMR spectrum of **4**.

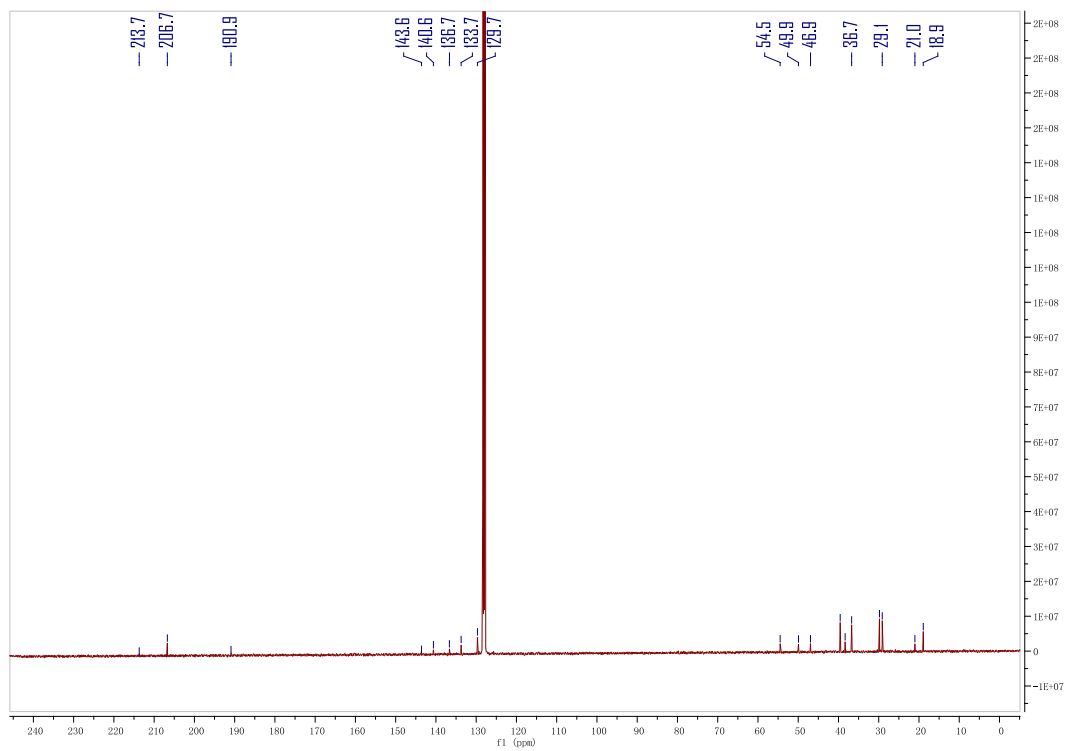

**Figure S7:**  $^{13}\text{C}$  NMR spectrum of **4**.

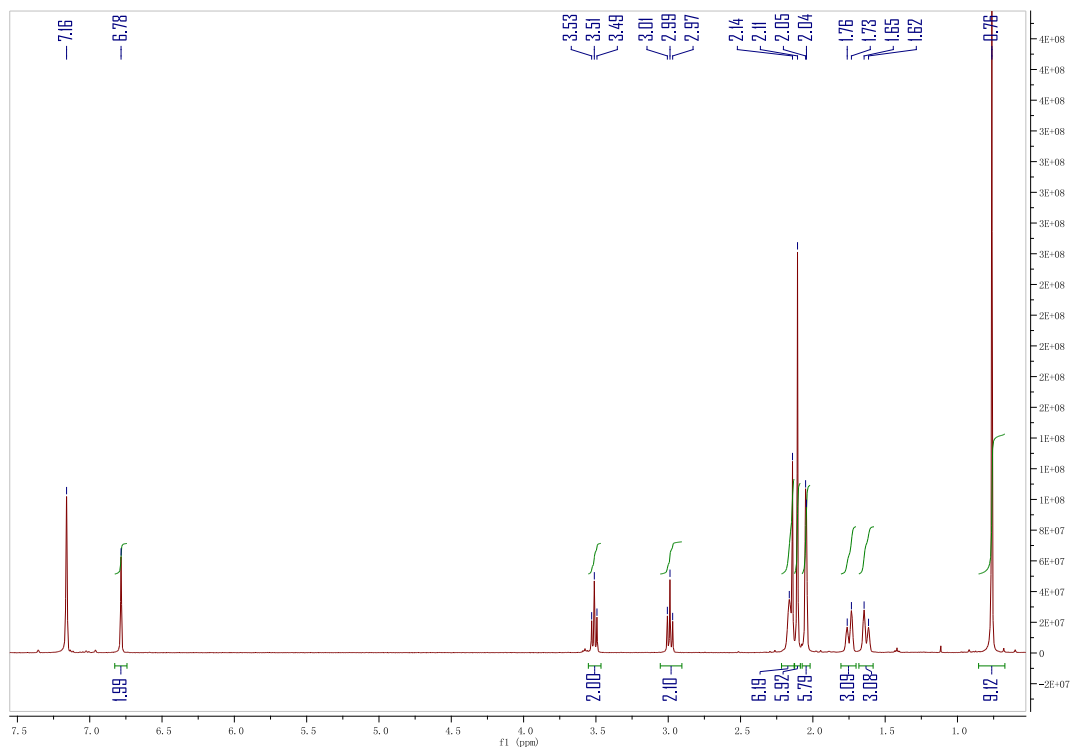

Figure S8:  $^1\text{H}$  NMR spectrum of 5.

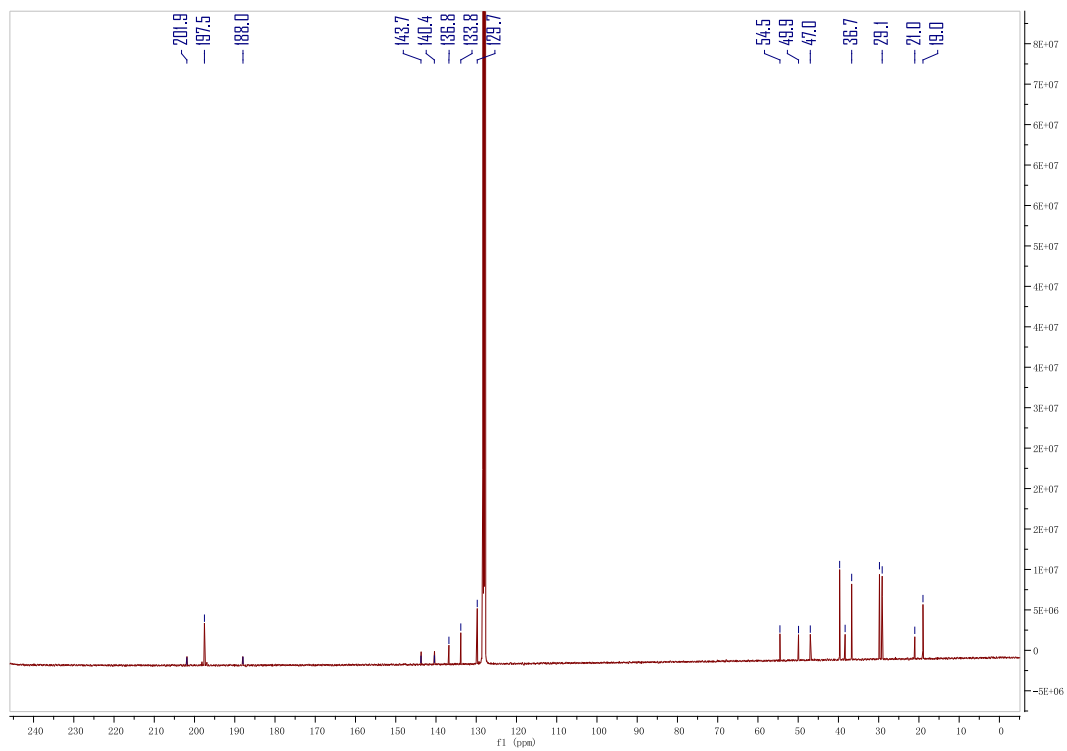

Figure S9:  $^{13}\text{C}$  NMR spectrum of 5.

## 2. Crystal structure parameters

X-ray data collection and structural refinement. Intensity data for compounds **2–5** was collected using a Bruker APEX II diffractometer. The structures were solved by direct phase determination (SHELX-2013) and refined for all data by full-matrix least squares methods on  $F^2$ .<sup>[S3]</sup> All non-hydrogen atoms were subjected to anisotropic refinement. The hydrogen atoms were generated geometrically and allowed to ride in their respective parent atoms; they were assigned appropriate isotropic thermal parameters and included in the structure-factor calculations. CCDC; 1429594-1429597 contains the supplementary crystallographic data for this paper. The data can be obtained free of charge from the Cambridge Crystallography Data Center via [www.ccdc.cam.ac.uk/data\\_request/cif](http://www.ccdc.cam.ac.uk/data_request/cif).

**Table S1 Crystallographic data for compounds 2–5.**

| Compounds                                         | <b>2</b> •(C <sub>6</sub> H <sub>6</sub> ) <sub>1</sub>                          | <b>3</b> •(THF) <sub>1</sub>                                      | <b>4</b> •(THF) <sub>1</sub>                                      | <b>5</b> •(THF) <sub>1</sub>                                     |
|---------------------------------------------------|----------------------------------------------------------------------------------|-------------------------------------------------------------------|-------------------------------------------------------------------|------------------------------------------------------------------|
| Formula                                           | C <sub>35</sub> H <sub>48</sub> F <sub>3</sub> GeN <sub>3</sub> O <sub>3</sub> S | C <sub>36</sub> H <sub>47</sub> CrGeN <sub>3</sub> O <sub>6</sub> | C <sub>36</sub> H <sub>47</sub> GeMoN <sub>3</sub> O <sub>6</sub> | C <sub>36</sub> H <sub>47</sub> GeWN <sub>3</sub> O <sub>6</sub> |
| Fw                                                | 720.41                                                                           | 742.35                                                            | 786.29                                                            | 874.20                                                           |
| Cryst syst                                        | monoclinic                                                                       | monoclinic                                                        | monoclinic                                                        | monoclinic                                                       |
| Space group                                       | P 1 21/n 1                                                                       | P 1 21/c 1                                                        | P 1 21/c 1                                                        | P 1 21/c 1                                                       |
| Size (mm <sup>3</sup> )                           | 0.120 x 0.180 x<br>0.320                                                         | 0.180 x 0.200 x<br>0.200                                          | 0.100 x 0.120 x<br>0.180                                          | 0.060 x 0.080 x<br>0.120                                         |
| T, K                                              | 103(2)                                                                           | 103(2)                                                            | 103(2)                                                            | 133(2)                                                           |
| <i>a</i> , Å                                      | 11.7454(9)                                                                       | 10.2157(3)                                                        | 10.3172(9)                                                        | 10.3691(5)                                                       |
| <i>b</i> , Å                                      | 24.4796(19)                                                                      | 22.5884(5)                                                        | 22.6231(18)                                                       | 22.6170(7)                                                       |
| <i>c</i> , Å                                      | 13.3037(10)                                                                      | 15.2996(5)                                                        | 15.3939(12)                                                       | 15.3476(7)                                                       |
| α, deg                                            | 90                                                                               | 90                                                                | 90                                                                | 90                                                               |
| β, deg                                            | 115.166(2)                                                                       | 97.6480(13)                                                       | 97.423(3)                                                         | 97.055(3)                                                        |
| γ, deg                                            | 90                                                                               | 90                                                                | 90                                                                | 90                                                               |
| V, Å <sup>3</sup>                                 | 3462.0(5)                                                                        | 3499.07(17)                                                       | 3562.9(5)                                                         | 3572.0(3)                                                        |
| Z                                                 | 4                                                                                | 4                                                                 | 4                                                                 | 4                                                                |
| <i>d</i> <sub>calcd</sub> g·cm <sup>-3</sup>      | 1.382                                                                            | 1.409                                                             | 1.466                                                             | 1.626                                                            |
| μ, mm <sup>-1</sup>                               | 1.000                                                                            | 1.218                                                             | 1.244                                                             | 4.107                                                            |
| Refl collected                                    | 40551                                                                            | 46257                                                             | 32532                                                             | 50991                                                            |
| <i>T</i> <sub>max</sub> / <i>T</i> <sub>min</sub> | 0.8890/0.7400                                                                    | 0.8110/0.7930                                                     | 0.8860/0.8070                                                     | 0.7910/ 0.6380                                                   |
| N <sub>measd</sub>                                | 8645                                                                             | 11215                                                             | 7754                                                              | 9666                                                             |
| [R <sub>int</sub> ]                               | 0.0751                                                                           | 0.0561                                                            | 0.1085                                                            | 0.0879                                                           |
| <i>R</i> [I>2σ(I)]                                | 0.0482                                                                           | 0.0403                                                            | 0.0512                                                            | 0.0416                                                           |
| <i>R</i> <sub>w</sub> [I>2σ(I)]                   | 0.1075                                                                           | 0.0894                                                            | 0.1292                                                            | 0.0885                                                           |
| GOF                                               | 1.025                                                                            | 1.017                                                             | 1.024                                                             | 1.001                                                            |
| Largest diff.<br>peak/hole[e·Å <sup>-3</sup> ]    | 1.357/-0.664                                                                     | 1.325/-1.138                                                      | 0.849/-1.298                                                      | 1.397/-1.289                                                     |

### 3. UV -Vis spectra

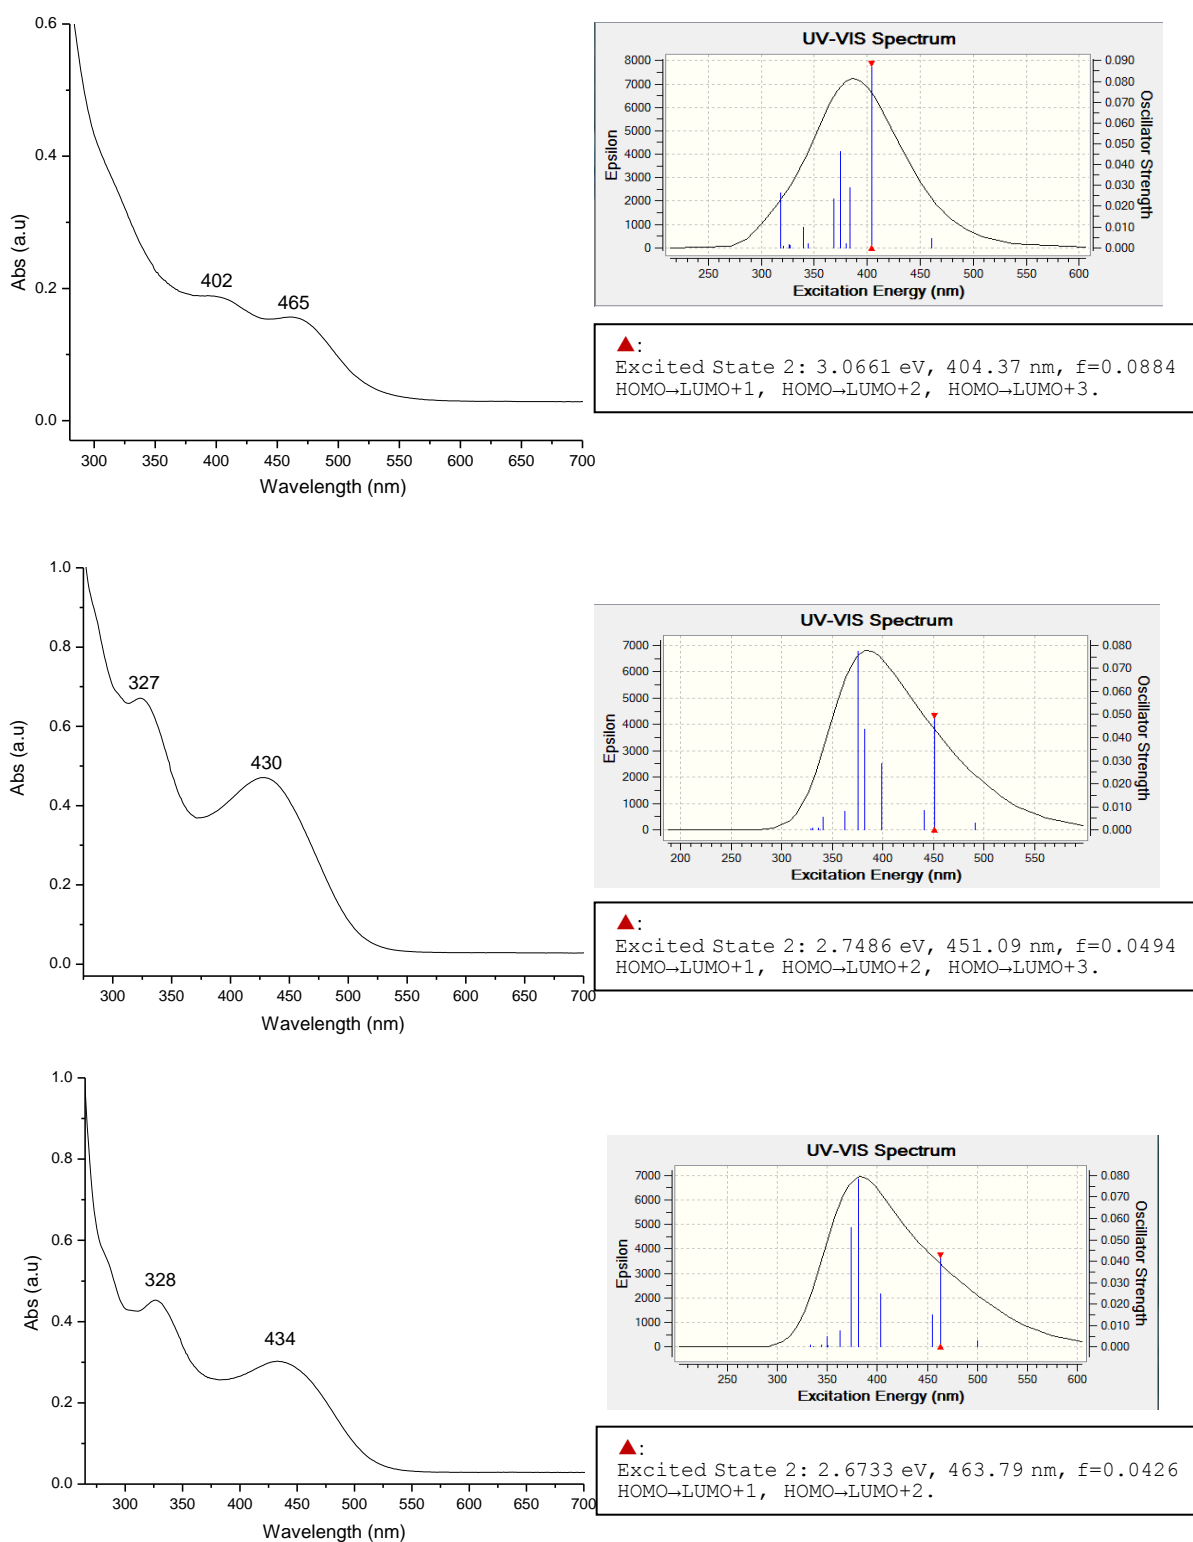

**Figure S10.** UV-Vis spectra of **3** (top), **4** (middle) and **5** (bottom) in THF, and TDDFT calculation results with assignments of the 2<sup>nd</sup> excited states.

#### 4. IR spectra

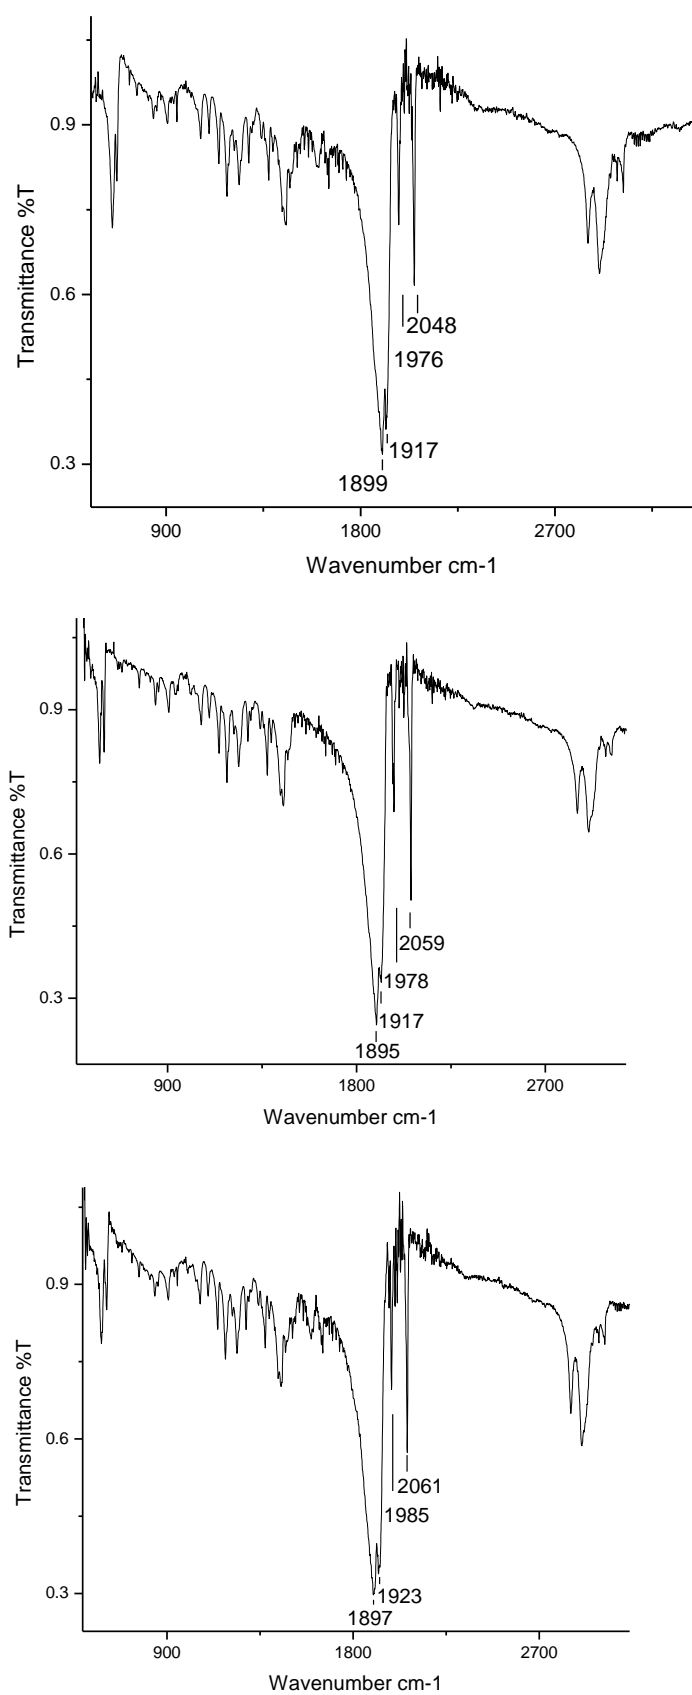

**Figure S11.** The IR spectra of **3** (top), **4** (middle) and **5** (bottom) in the solid state.

## 5. Theoretical calculation

Gaussian 09 was used for all density functional theory (DFT) calculations.<sup>[S4]</sup> Geometry optimization, frequency calculations, natural bond orbital (NBO) analysis, TDDFT and NICS calculations of compound **2–5** were performed at the B3LYP/6-311G(d,p) level of theory, with the LANL2TZ(f) pseudo-potential applied for the metal atoms.

**Figure S12.** Calculated optimized structures for **2, 3, 4** and **5**.

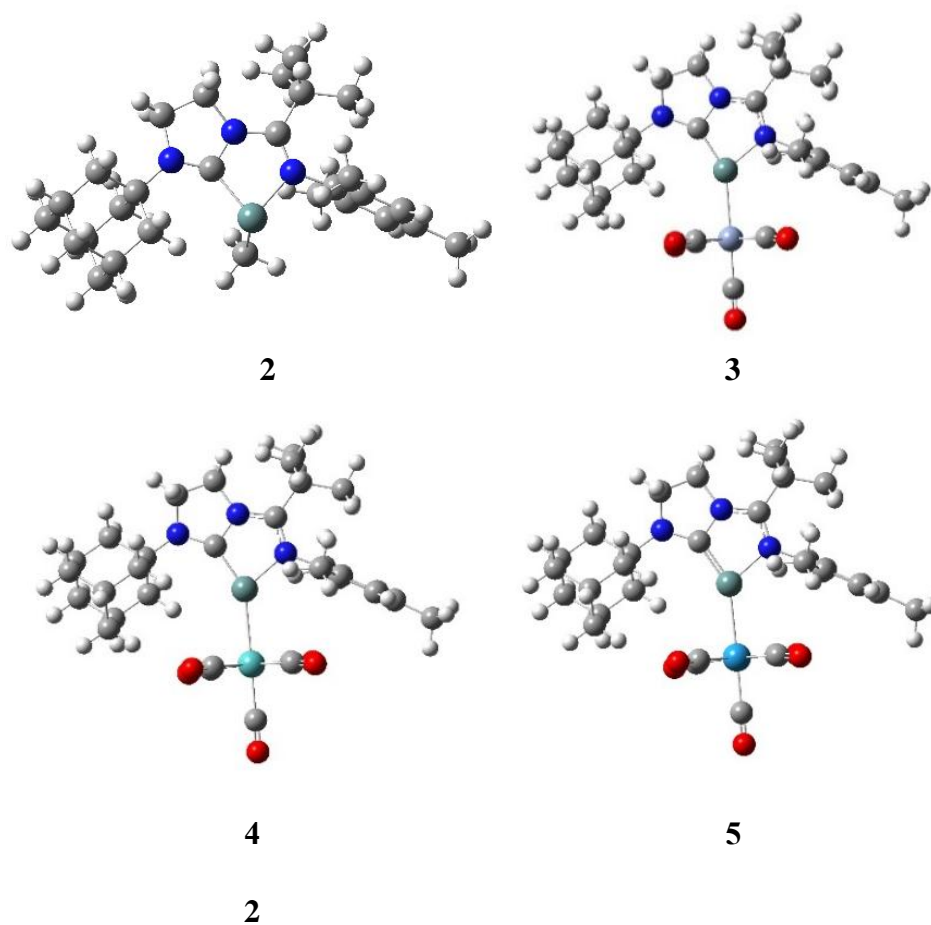

|    |           |           |           |
|----|-----------|-----------|-----------|
| Ge | -0.160593 | -1.079018 | -0.603191 |
| C  | 0.828228  | 0.643073  | -0.133302 |
| H  | 2.322121  | -1.657319 | -0.469518 |
| N  | -0.048857 | 1.707194  | -0.038006 |
| N  | -1.722820 | 0.202143  | -0.093956 |
| N  | 2.078088  | 1.078868  | -0.135769 |
| C  | 3.152109  | -1.063385 | -0.863137 |
| H  | -1.820359 | -0.221594 | 2.420471  |
| C  | 0.702593  | 2.981516  | -0.181708 |

|   |           |           |           |
|---|-----------|-----------|-----------|
| C | -1.434255 | 1.467019  | -0.010778 |
| C | -3.010452 | -0.452295 | -0.029616 |
| C | 2.131806  | 2.538925  | 0.118045  |
| C | 3.319484  | 0.234473  | -0.050772 |
| H | 2.923844  | -0.824363 | -1.906165 |
| C | 4.437284  | -1.915184 | -0.768683 |
| C | -2.868873 | -0.493889 | 2.528218  |
| H | 0.357675  | 3.750664  | 0.499973  |
| H | 0.611703  | 3.339677  | -1.208207 |

|   |           |           |           |
|---|-----------|-----------|-----------|
| C | -2.391802 | 2.673552  | 0.155468  |
| C | -3.515835 | -0.861763 | 1.213322  |
| C | -3.664876 | -0.782627 | -1.232643 |
| H | 2.849028  | 3.029482  | -0.534576 |
| H | 2.418203  | 2.720336  | 1.158264  |
| C | 3.610301  | -0.116143 | 1.428231  |
| C | 4.516281  | 1.023093  | -0.631812 |
| C | 5.622756  | -1.123190 | -1.347085 |
| H | 4.284893  | -2.832213 | -1.344641 |
| C | 4.712878  | -2.263099 | 0.707321  |
| H | -3.387004 | 0.351841  | 2.994126  |
| H | -2.928642 | -1.326163 | 3.232255  |
| C | -2.150379 | 3.310012  | 1.549546  |
| C | -2.166985 | 3.709541  | -0.981150 |
| C | -3.889176 | 2.300964  | 0.092849  |
| C | -4.706363 | -1.595053 | 1.229751  |
| C | -4.850946 | -1.509929 | -1.154030 |
| C | -3.142804 | -0.343333 | -2.579883 |
| H | 2.761905  | -0.668110 | 1.845145  |
| H | 3.727870  | 0.799709  | 2.017789  |
| C | 4.898124  | -0.964317 | 1.514940  |
| H | 4.312251  | 1.292279  | -1.674176 |
| H | 4.671726  | 1.950720  | -0.073301 |
| C | 5.801345  | 0.173675  | -0.538851 |
| H | 6.535527  | -1.724750 | -1.299638 |
| H | 5.448153  | -0.892966 | -2.403710 |
| H | 3.887546  | -2.853414 | 1.120665  |
| H | 5.611895  | -2.882225 | 0.782754  |

|   |           |           |           |
|---|-----------|-----------|-----------|
| H | -2.791486 | 4.188529  | 1.649155  |
| H | -1.124405 | 3.633316  | 1.722439  |
| H | -2.417196 | 2.611244  | 2.344578  |
| H | -2.171621 | 3.231907  | -1.964376 |
| H | -1.254815 | 4.291867  | -0.882799 |
| H | -2.994575 | 4.420484  | -0.962348 |
| H | -4.176345 | 1.874972  | -0.867547 |
| H | -4.456238 | 3.225156  | 0.223524  |
| H | -4.194231 | 1.616035  | 0.879217  |
| H | -5.106581 | -1.907835 | 2.189079  |
| C | -5.390029 | -1.931994 | 0.064411  |
| H | -5.369301 | -1.755027 | -2.075354 |
| H | -3.822362 | -0.659076 | -3.371647 |
| H | -2.158768 | -0.768198 | -2.794203 |
| H | -3.044278 | 0.745026  | -2.645830 |
| H | 5.088329  | -1.204000 | 2.565057  |
| C | 6.081727  | -0.163571 | 0.938486  |
| H | 6.630258  | 0.756961  | -0.949552 |
| C | -6.657347 | -2.748435 | 0.106971  |
| H | 7.003238  | -0.747998 | 1.019771  |
| H | 6.238143  | 0.754438  | 1.515969  |
| H | -7.380463 | -2.398981 | -0.633393 |
| H | -7.128559 | -2.704718 | 1.090291  |
| H | -6.448734 | -3.800500 | -0.113370 |
| C | -0.044664 | -2.092758 | 1.145730  |
| H | 0.742209  | -2.842446 | 1.040237  |
| H | 0.152115  | -1.486199 | 2.028033  |
| H | -0.989348 | -2.624690 | 1.272764  |

### 3

|    |           |           |           |
|----|-----------|-----------|-----------|
| Ge | 0.097271  | -0.050560 | -0.028143 |
| Cr | 0.289847  | -2.612021 | -0.042388 |
| C  | -0.936568 | 1.515844  | -0.178296 |
| C  | -2.293230 | 3.370262  | 0.091746  |
| C  | -0.927213 | 3.859774  | -0.351041 |
| C  | 1.247163  | 2.515332  | -0.078392 |
| C  | 2.154386  | 3.766960  | 0.032578  |
| C  | 1.868385  | 4.484933  | 1.379002  |
| C  | 1.927036  | 4.728731  | -1.165279 |
| C  | 3.671551  | 3.473072  | 0.026101  |
| C  | 2.924312  | 0.681195  | 0.033288  |

|   |           |           |           |
|---|-----------|-----------|-----------|
| C | 3.515144  | 0.365308  | 1.266754  |
| C | 2.845593  | 0.670417  | 2.585108  |
| C | 4.785296  | -0.217752 | 1.264719  |
| C | 5.469891  | -0.501267 | 0.085455  |
| C | 6.820782  | -1.174353 | 0.107973  |
| C | 4.848470  | -0.186219 | -1.124634 |
| C | 3.582854  | 0.394844  | -1.177629 |
| C | 2.964881  | 0.727180  | -2.513492 |
| C | -3.464831 | 1.135705  | -0.099785 |
| C | -3.696784 | 0.800330  | 1.395944  |
| C | -3.341352 | -0.178950 | -0.891466 |



|   |           |           |           |
|---|-----------|-----------|-----------|
| C | -4.706566 | 1.895024  | -0.631247 |
| C | -5.979241 | 1.041677  | -0.471985 |
| C | -6.190490 | 0.726032  | 1.021906  |
| C | -4.974475 | -0.054905 | 1.556013  |
| C | -4.827585 | -1.365632 | 0.760133  |
| C | -4.610122 | -1.039933 | -0.730525 |
| C | -5.827031 | -0.266789 | -1.267557 |
| C | 1.633205  | -2.544126 | -1.404459 |
| C | 1.627969  | -2.567914 | 1.323043  |
| C | 0.394177  | -4.473392 | -0.029184 |
| C | -1.028322 | -2.669645 | 1.332933  |
| C | -1.028560 | -2.734718 | -1.419164 |
| N | -2.264177 | 1.970544  | -0.336580 |
| N | -0.105161 | 2.650323  | -0.151644 |
| N | 1.587311  | 1.213362  | -0.011097 |
| O | 2.420394  | -2.567829 | -2.236130 |
| O | 2.407083  | -2.625140 | 2.161131  |
| O | 0.454986  | -5.621137 | -0.019886 |
| O | -1.795973 | -2.739716 | 2.182793  |
| O | -1.797673 | -2.870512 | -2.258603 |
| H | -2.401697 | 3.471127  | 1.184023  |
| H | -3.089692 | 3.930653  | -0.393598 |
| H | -0.936309 | 4.118251  | -1.413236 |
| H | -0.577045 | 4.706309  | 0.228599  |
| H | 0.828663  | 4.783535  | 1.507710  |
| H | 2.482084  | 5.387454  | 1.448956  |
| H | 2.129001  | 3.835766  | 2.217514  |
| H | 2.082441  | 4.206881  | -2.112829 |
| H | 2.656785  | 5.540452  | -1.109729 |
| H | 0.942347  | 5.187962  | -1.191282 |

|   |           |           |           |
|---|-----------|-----------|-----------|
| H | 3.993073  | 2.858599  | 0.862893  |
| H | 4.187391  | 4.433551  | 0.105512  |
| H | 4.004508  | 2.997461  | -0.895032 |
| H | 3.145706  | 1.656308  | 2.959855  |
| H | 3.133621  | -0.065410 | 3.337196  |
| H | 1.758334  | 0.667667  | 2.503243  |
| H | 5.241562  | -0.468577 | 2.217324  |
| H | 7.317426  | -1.040865 | 1.071210  |
| H | 7.476909  | -0.778173 | -0.671047 |
| H | 6.722141  | -2.251157 | -0.065552 |
| H | 5.355934  | -0.412777 | -2.057227 |
| H | 3.481178  | 0.199178  | -3.315777 |
| H | 3.027304  | 1.800197  | -2.727568 |
| H | 1.908057  | 0.456060  | -2.549828 |
| H | -3.798685 | 1.725072  | 1.975517  |
| H | -2.829231 | 0.265346  | 1.793734  |
| H | -2.482525 | -0.746090 | -0.529634 |
| H | -3.156244 | 0.047527  | -1.946145 |
| H | -4.846287 | 2.829858  | -0.080021 |
| H | -4.542811 | 2.155380  | -1.682956 |
| H | -6.834058 | 1.610561  | -0.853362 |
| H | -7.103617 | 0.135394  | 1.155720  |
| H | -6.325664 | 1.655206  | 1.588208  |
| H | -5.118898 | -0.283161 | 2.617227  |
| H | -3.992352 | -1.951545 | 1.150983  |
| H | -5.728972 | -1.977251 | 0.880547  |
| H | -4.476652 | -1.965846 | -1.297541 |
| H | -6.733877 | -0.874342 | -1.172827 |
| H | -5.697535 | -0.047229 | -2.333455 |

4

|    |           |           |           |
|----|-----------|-----------|-----------|
| Ge | 0.075470  | 0.135497  | -0.033753 |
| Mo | 0.322265  | -2.563713 | -0.041460 |
| C  | -0.980550 | 1.686098  | -0.187211 |
| C  | -2.370499 | 3.517999  | 0.063972  |
| C  | -1.009095 | 4.028054  | -0.371177 |
| C  | 1.185921  | 2.718917  | -0.079494 |
| C  | 2.074255  | 3.983427  | 0.030056  |
| C  | 1.770113  | 4.704848  | 1.370638  |
| C  | 1.840228  | 4.935991  | -1.173625 |
| C  | 3.594776  | 3.708349  | 0.034152  |
| C  | 2.886792  | 0.904998  | 0.040725  |

|   |           |           |           |
|---|-----------|-----------|-----------|
| C | 3.548055  | 0.620029  | -1.169192 |
| C | 2.924300  | 0.937912  | -2.505879 |
| C | 4.819927  | 0.052861  | -1.114120 |
| C | 5.444391  | -0.251669 | 0.097192  |
| C | 6.803454  | -0.907995 | 0.122201  |
| C | 4.755194  | 0.025772  | 1.275180  |
| C | 3.478363  | 0.594337  | 1.275001  |
| C | 2.800242  | 0.887642  | 2.591630  |
| C | -3.496535 | 1.256683  | -0.105344 |
| C | -4.760786 | 1.998432  | -0.607390 |
| C | -6.015642 | 1.121937  | -0.432493 |

|   |           |           |           |
|---|-----------|-----------|-----------|
| C | -6.194264 | 0.788986  | 1.061857  |
| C | -4.955013 | 0.025485  | 1.566739  |
| C | -3.696232 | 0.904617  | 1.391052  |
| C | -3.365141 | -0.048667 | -0.913253 |
| C | -4.615761 | -0.932775 | -0.735291 |
| C | -5.856113 | -0.176824 | -1.242206 |
| C | -4.798721 | -1.275111 | 0.756227  |
| C | 1.744109  | -2.478003 | -1.544845 |
| C | 1.802975  | -2.506456 | 1.402049  |
| C | -1.066144 | -2.658803 | 1.479133  |
| C | -1.139847 | -2.732957 | -1.489865 |
| C | 0.469194  | -4.567216 | -0.031524 |
| N | 1.544546  | 1.422629  | -0.006618 |
| N | -0.168515 | 2.833606  | -0.159673 |
| N | -2.314586 | 2.115415  | -0.353408 |
| O | 2.519577  | -2.478083 | -2.386857 |
| O | 2.603103  | -2.551080 | 2.219939  |
| O | -1.814411 | -2.734390 | 2.344498  |
| O | -1.933039 | -2.879988 | -2.303812 |
| O | 0.548220  | -5.714440 | -0.025959 |
| H | -2.489887 | 3.624838  | 1.154540  |
| H | -3.172206 | 4.061468  | -0.431933 |
| H | -1.014491 | 4.281089  | -1.434727 |
| H | -0.677580 | 4.883514  | 0.206492  |
| H | 0.726691  | 4.995151  | 1.488432  |
| H | 2.375169  | 5.613082  | 1.441597  |
| H | 2.028824  | 4.062087  | 2.214662  |
| H | 2.009366  | 4.412542  | -2.117925 |
| H | 2.556875  | 5.759288  | -1.117366 |
| H | 0.848543  | 5.379566  | -1.207450 |

|   |           |           |           |
|---|-----------|-----------|-----------|
| H | 3.918406  | 3.102481  | 0.876535  |
| H | 4.098924  | 4.675210  | 0.111013  |
| H | 3.938704  | 3.230942  | -0.882048 |
| H | 3.459631  | 0.429798  | -3.308613 |
| H | 2.951449  | 2.013024  | -2.716361 |
| H | 1.876741  | 0.632414  | -2.545248 |
| H | 5.330341  | -0.170623 | -2.045854 |
| H | 6.718869  | -1.985557 | -0.053897 |
| H | 7.295592  | -0.770363 | 1.087134  |
| H | 7.456855  | -0.501895 | -0.654012 |
| H | 5.212768  | -0.219621 | 2.228518  |
| H | 3.065204  | 1.886348  | 2.958803  |
| H | 3.114693  | 0.168591  | 3.349559  |
| H | 1.713647  | 0.846099  | 2.510217  |
| H | -4.621590 | 2.270489  | -1.659723 |
| H | -4.906570 | 2.925891  | -0.045348 |
| H | -6.886770 | 1.679592  | -0.792936 |
| H | -6.335659 | 1.710205  | 1.639486  |
| H | -7.094208 | 0.180893  | 1.206324  |
| H | -5.075854 | -0.214874 | 2.628205  |
| H | -2.812454 | 0.382142  | 1.769246  |
| H | -3.803591 | 1.822788  | 1.980075  |
| H | -2.488545 | -0.606368 | -0.578548 |
| H | -3.207749 | 0.193646  | -1.969092 |
| H | -4.477926 | -1.851389 | -1.312840 |
| H | -6.750229 | -0.801014 | -1.135548 |
| H | -5.750745 | 0.053718  | -2.308426 |
| H | -5.685408 | -1.905459 | 0.888381  |
| H | -3.945378 | -1.848761 | 1.126118  |

5

|    |           |           |           |
|----|-----------|-----------|-----------|
| W  | 0.324024  | -2.332169 | -0.032048 |
| Ge | 0.050471  | 0.333801  | -0.034959 |
| C  | 1.800853  | -2.257768 | 1.393930  |
| C  | 1.733412  | -2.233919 | -1.526442 |
| C  | 0.491009  | -4.327208 | -0.011947 |
| C  | -1.128515 | -2.530760 | -1.466985 |
| C  | -1.051638 | -2.427447 | 1.481954  |
| C  | -1.030741 | 1.861827  | -0.187454 |
| C  | -2.445525 | 3.672621  | 0.068575  |
| C  | -1.092704 | 4.202761  | -0.368589 |
| C  | 1.121296  | 2.926084  | -0.079399 |

|   |           |          |           |
|---|-----------|----------|-----------|
| C | 1.991136  | 4.203402 | 0.030785  |
| C | 1.676319  | 4.920020 | 1.371627  |
| C | 1.742633  | 5.152039 | -1.173008 |
| C | 3.515662  | 3.951573 | 0.035055  |
| C | -3.541439 | 1.396565 | -0.105368 |
| C | -3.730173 | 1.030604 | 1.388983  |
| C | -3.397929 | 0.099342 | -0.923981 |
| C | -4.816572 | 2.127009 | -0.596269 |
| C | -6.060040 | 1.234263 | -0.422681 |
| C | -6.228091 | 0.887923 | 1.069834  |
| C | -4.977708 | 0.135417 | 1.563481  |

|   |           |           |           |   |           |           |           |
|---|-----------|-----------|-----------|---|-----------|-----------|-----------|
| C | -4.809550 | -1.157096 | 0.742317  | H | 4.004806  | 4.926240  | 0.110125  |
| C | -4.636978 | -0.801111 | -0.747211 | H | 3.866699  | 3.477740  | -0.880204 |
| C | -5.888492 | -0.056228 | -1.243120 | H | 3.848675  | 3.352556  | 0.878668  |
| C | 2.850830  | 1.138692  | 0.038913  | H | -3.845280 | 1.942755  | 1.985872  |
| C | 3.516080  | 0.864744  | -1.171257 | H | -2.839408 | 0.514771  | 1.759571  |
| C | 2.887596  | 1.172417  | -2.508140 | H | -2.512946 | -0.449261 | -0.597097 |
| C | 4.797300  | 0.319266  | -1.116127 | H | -3.248282 | 0.351432  | -1.978667 |
| C | 5.427204  | 0.026330  | 0.095229  | H | -4.971497 | 3.048226  | -0.026460 |
| C | 6.796846  | -0.607453 | 0.120378  | H | -4.685566 | 2.408537  | -1.647181 |
| C | 4.733943  | 0.292766  | 1.273344  | H | -6.939206 | 1.784345  | -0.775135 |
| C | 3.447530  | 0.839022  | 1.273268  | H | -7.120135 | 0.268165  | 1.213631  |
| C | 2.764905  | 1.120352  | 2.590200  | H | -6.377921 | 1.803033  | 1.655038  |
| N | -2.370813 | 2.271738  | -0.351767 | H | -5.090602 | -0.114396 | 2.623580  |
| N | -0.234263 | 3.020567  | -0.159211 | H | -3.948133 | -1.723588 | 1.104249  |
| N | 1.499811  | 1.634742  | -0.008258 | H | -5.688278 | -1.798775 | 0.873072  |
| O | 2.609669  | -2.289073 | 2.207046  | H | -4.489991 | -1.713415 | -1.332328 |
| O | 2.511291  | -2.220427 | -2.369107 | H | -5.790464 | 0.183819  | -2.307949 |
| O | 0.582342  | -5.475602 | -0.000399 | H | -6.774497 | -0.692037 | -1.137624 |
| O | -1.924054 | -2.692753 | -2.278959 | H | 2.904964  | 2.247095  | -2.722160 |
| O | -1.802569 | -2.498033 | 2.348479  | H | 1.842993  | 0.857128  | -2.546179 |
| H | -2.564252 | 3.775625  | 1.159574  | H | 3.426633  | 0.666390  | -3.309634 |
| H | -3.255682 | 4.205487  | -0.424859 | H | 5.311045  | 0.103520  | -2.047808 |
| H | -1.103383 | 4.455672  | -1.432086 | H | 7.289487  | -0.455493 | 1.082902  |
| H | -0.772428 | 5.062606  | 0.208778  | H | 7.441211  | -0.196048 | -0.660537 |
| H | 1.943713  | 4.280753  | 2.215599  | H | 6.728895  | -1.687366 | -0.048217 |
| H | 0.629116  | 5.196341  | 1.489553  | H | 5.195726  | 0.055323  | 2.226635  |
| H | 2.268999  | 5.836307  | 1.442714  | H | 3.081226  | 0.397522  | 3.343665  |
| H | 0.743432  | 5.578125  | -1.208550 | H | 1.678731  | 1.073629  | 2.506698  |
| H | 1.922533  | 4.631856  | -2.117104 | H | 3.024268  | 2.117964  | 2.964166  |
| H | 2.444633  | 5.987752  | -1.115300 |   |           |           |           |

**Figure S13.** Plots of the frontier orbitals of compounds **3**, **4** and **5**. Orbital energies (in eV) are shown in parentheses.

**Compound 3:**

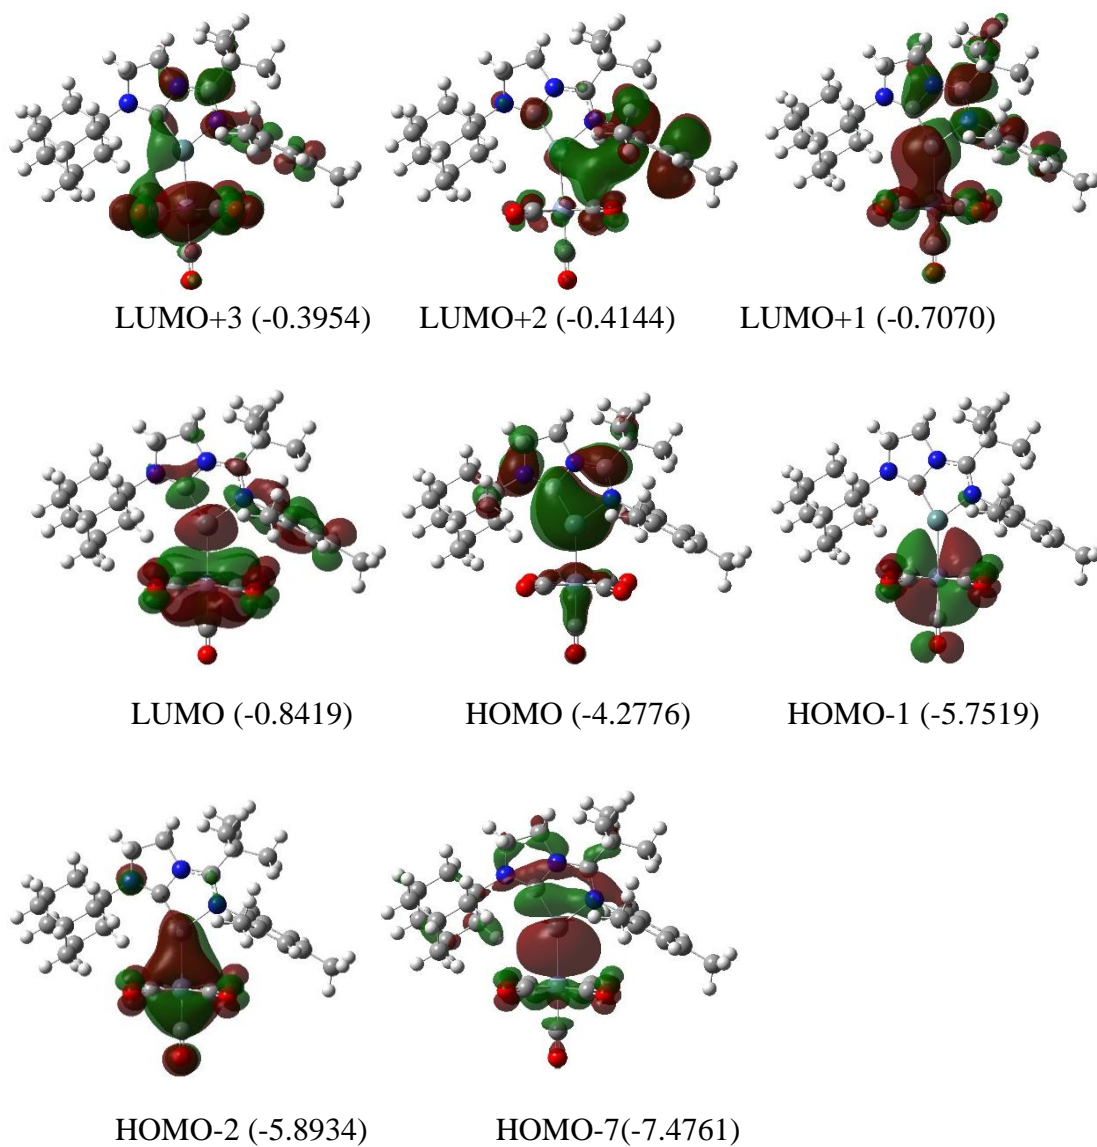

**Compound 4:**

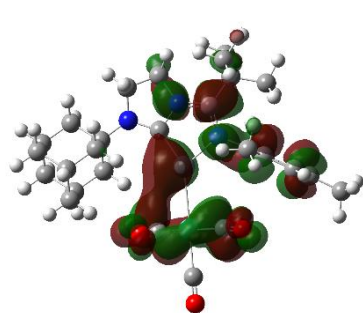

LUMO+3 (-0.5864)

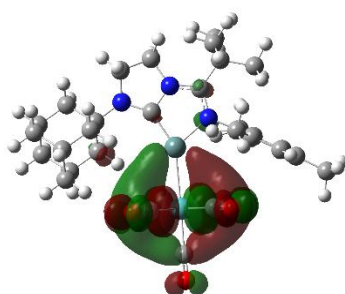

LUMO+2 (-0.7758)

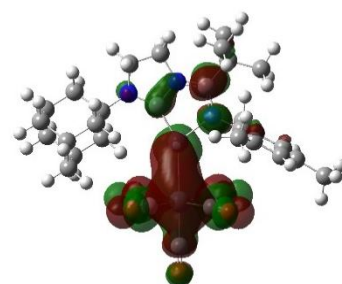

LUMO+1 (-0.9578)

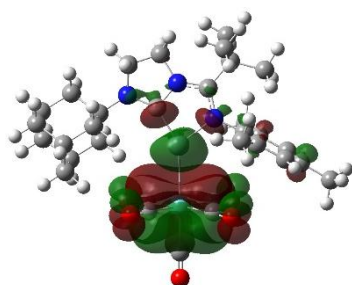

LUMO (-1.0735)

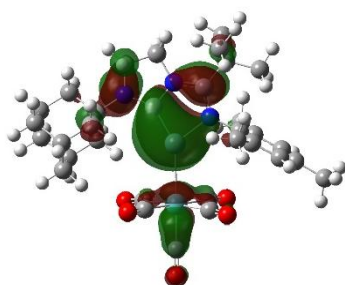

HOMO (-4.2719)

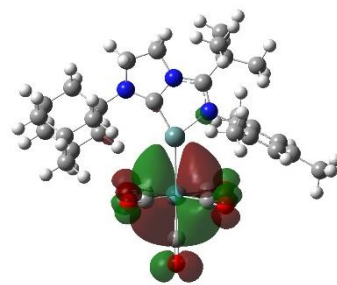

HOMO-1 (-5.7130)

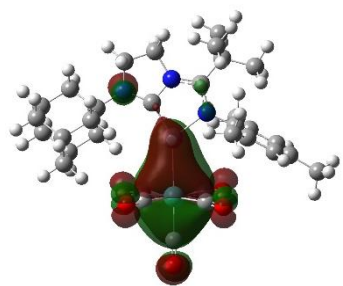

HOMO-2 (-5.8627)

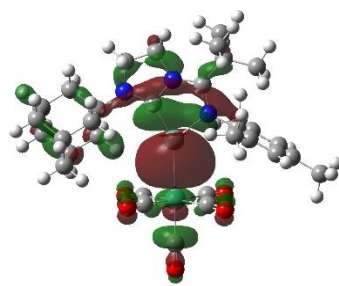

HOMO-7(-7.4807)

**Compound 5:**

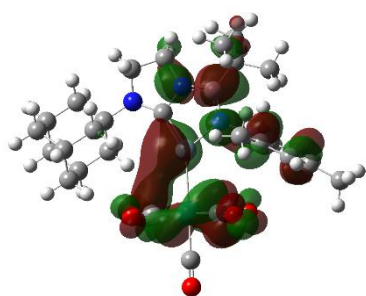

LUMO+3 (-0.6455)

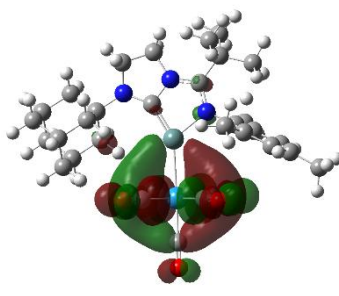

LUMO+2 (-0.8912)

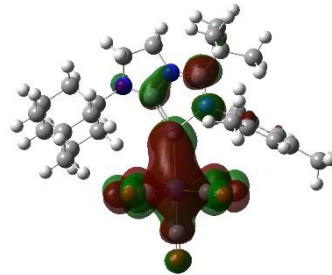

LUMO+1 (-1.0572)

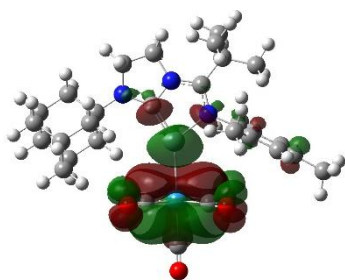

LUMO (-1.1557)

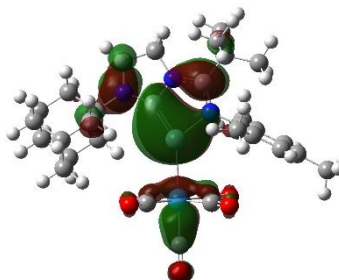

HOMO (-4.3095)

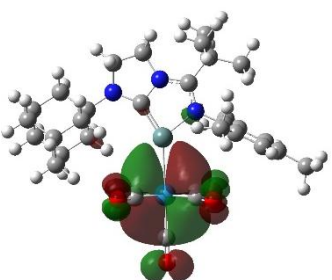

HOMO-1 (-5.6861)

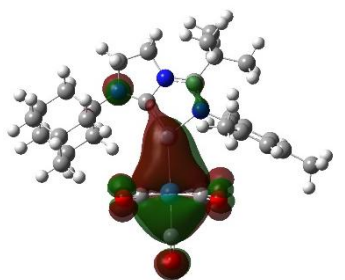

HOMO-2 (-5.8646)

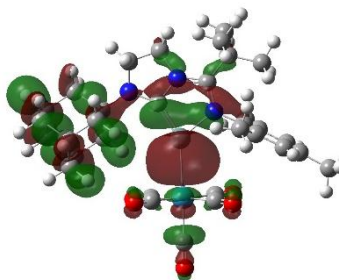

HOMO-7 (-7.7052)

**Figure S14.** Calculated NICS values for **1**, **3**, **4** and **5**.

|         | <b>1</b> | <b>3</b> | <b>4</b> | <b>5</b> |
|---------|----------|----------|----------|----------|
| NICS(0) | -9.36    | -9.79    | -9.80    | -9.86    |
| NICS(1) | -6.27    | -6.15    | -6.15    | -6.13    |

**Figure S15.** NBO result showing the bonding interaction between the Ge and Cr atoms in **3**.

| (Occupancy)  | Bond orbital/ | Coefficients/ | Hybrids        |                |                 |              |  |  |  |
|--------------|---------------|---------------|----------------|----------------|-----------------|--------------|--|--|--|
| 1. (1.79133) | BD (1)Ge      | 1 -Cr         | 2              | 1 s( 59.66%)p  | 0.68( 40.29%)d  | 0.00( 0.05%) |  |  |  |
| ( 64.92%)    | 0.8058*Ge     | 1 s( 15.46%)p | 3.63( 56.09%)d | 1.84( 28.45%)  |                 |              |  |  |  |
|              |               | 0.0102        | 0.0000         | f 0.00( 0.00%) |                 |              |  |  |  |
|              |               | -0.0020       | 0.3897         | -0.0505        | 0.0138          | 0.0029       |  |  |  |
|              |               | 0.0011        | 0.0002         | 0.0000         | 0.0003          | -0.0521      |  |  |  |
|              |               | 0.0019        | 0.0012         | -0.0001        | -0.0024         | 0.7466       |  |  |  |
|              |               | -0.0264       | 0.0005         | 0.0009         | -0.0001         | 0.0000       |  |  |  |
|              |               | -0.0007       | 0.0003         | 0.0000         | -0.0489         | 0.0161       |  |  |  |
|              |               | 0.0002        | 0.0085         | -0.0013        | -0.0006         | -0.0037      |  |  |  |
|              |               | -0.0026       | 0.0000         | -0.4453        | 0.0910          | 0.0063       |  |  |  |
|              |               | -0.2687       | 0.0535         | 0.0035         | 0.0000          | 0.0001       |  |  |  |
|              |               | -0.0008       | -0.0001        | 0.0000         | 0.0003          | -0.0010      |  |  |  |
| 2. (1.58324) | BD (2)Ge      | 1 -Cr         | 2              | 1 s( 0.42%)p   | 99.99( 99.05%)d | 1.24( 0.53%) |  |  |  |
| ( 1.67%)     | 0.1293*Ge     | 1 s( 0.00%)p  | 1.00( 1.69%)d  | 58.14( 98.31%) |                 |              |  |  |  |
|              |               | 0.0041        | -0.0002        | f 0.00( 0.00%) |                 |              |  |  |  |
|              |               | -0.0002       | 0.0034         | -0.0015        | 0.0001          | 0.0004       |  |  |  |
|              |               | 0.0000        | 0.0000         | 0.0000         | -0.0013         | 0.0728       |  |  |  |
|              |               | -0.0026       | -0.0017        | -0.0001        | -0.0002         | 0.0041       |  |  |  |
|              |               | -0.0018       | 0.0002         | 0.0000         | 0.0023          | -0.1075      |  |  |  |
|              |               | 0.0016        | 0.0010         | 0.0002         | -0.5231         | -0.0264      |  |  |  |
|              |               | 0.0000        | -0.0468        | -0.0013        | 0.0003          | 0.8380       |  |  |  |
|              |               | 0.0410        | 0.0003         | 0.0512         | 0.0035          | 0.0000       |  |  |  |
|              |               | -0.0009       | 0.0009         | 0.0000         | 0.0009          | 0.0003       |  |  |  |
|              |               | 0.0001        | 0.0003         | -0.0001        | -0.0005         | -0.0001      |  |  |  |

**Table S2.** The NPA charges of **3** calculated at the B3LYP/6-311G(d,p) level of theory, with the LANL2TZ(f) pseudo-potential applied for the Cr atom.

| Atom | No | Natural Charge | Core     | Valence | Rydberg | Total    |
|------|----|----------------|----------|---------|---------|----------|
| Ge   | 1  | 1.16572        | 28.00000 | 2.81526 | 0.01902 | 30.83428 |
| Cr   | 2  | -2.62631       | 17.95983 | 8.61342 | 0.05307 | 26.62631 |
| C    | 3  | -0.21821       | 1.99908  | 4.18238 | 0.03675 | 6.21821  |
| C    | 4  | -0.18038       | 1.99943  | 4.16410 | 0.01685 | 6.18038  |
| C    | 5  | -0.18004       | 1.99941  | 4.16423 | 0.01640 | 6.18004  |
| C    | 6  | 0.44634        | 1.99903  | 3.52166 | 0.03298 | 5.55366  |
| C    | 7  | -0.06207       | 1.99935  | 4.04942 | 0.01330 | 6.06207  |
| C    | 8  | -0.57130       | 1.99943  | 4.56078 | 0.01109 | 6.57130  |
| C    | 9  | -0.57742       | 1.99944  | 4.56687 | 0.01112 | 6.57742  |
| C    | 10 | -0.58013       | 1.99945  | 4.56811 | 0.01256 | 6.58013  |
| C    | 11 | 0.12865        | 1.99886  | 3.85219 | 0.02029 | 5.87135  |
| C    | 12 | -0.00752       | 1.99906  | 3.99259 | 0.01587 | 6.00752  |
| C    | 13 | -0.60024       | 1.99943  | 4.59148 | 0.00933 | 6.60024  |
| C    | 14 | -0.20829       | 1.99908  | 4.19436 | 0.01484 | 6.20829  |
| C    | 15 | 0.00360        | 1.99917  | 3.98265 | 0.01458 | 5.99640  |
| C    | 16 | -0.59058       | 1.99944  | 4.58229 | 0.00884 | 6.59058  |
| C    | 17 | -0.20860       | 1.99908  | 4.19466 | 0.01485 | 6.20860  |
| C    | 18 | -0.00394       | 1.99906  | 3.98914 | 0.01573 | 6.00394  |
| C    | 19 | -0.59527       | 1.99944  | 4.58660 | 0.00924 | 6.59527  |
| C    | 20 | 0.19598        | 1.99927  | 3.78294 | 0.02182 | 5.80402  |
| C    | 21 | -0.41686       | 1.99933  | 4.40149 | 0.01604 | 6.41686  |
| C    | 22 | -0.40754       | 1.99933  | 4.39008 | 0.01813 | 6.40754  |
| C    | 23 | -0.40521       | 1.99934  | 4.38889 | 0.01698 | 6.40521  |
| C    | 24 | -0.19347       | 1.99942  | 4.17716 | 0.01689 | 6.19347  |
| C    | 25 | -0.39057       | 1.99941  | 4.37556 | 0.01560 | 6.39057  |
| C    | 26 | -0.19369       | 1.99942  | 4.17750 | 0.01676 | 6.19369  |
| C    | 27 | -0.39586       | 1.99940  | 4.38120 | 0.01526 | 6.39586  |
| C    | 28 | -0.19500       | 1.99941  | 4.17901 | 0.01658 | 6.19500  |
| C    | 29 | -0.38941       | 1.99941  | 4.37445 | 0.01555 | 6.38941  |
| C    | 30 | 0.84444        | 1.99908  | 3.10053 | 0.05595 | 5.15556  |
| C    | 31 | 0.84454        | 1.99907  | 3.10048 | 0.05591 | 5.15546  |
| C    | 32 | 0.84078        | 1.99890  | 3.10402 | 0.05631 | 5.15922  |
| C    | 33 | 0.83992        | 1.99907  | 3.10446 | 0.05655 | 5.16008  |
| C    | 34 | 0.83677        | 1.99907  | 3.10771 | 0.05645 | 5.16323  |
| N    | 35 | -0.51624       | 1.99931  | 5.49484 | 0.02209 | 7.51624  |
| N    | 36 | -0.39452       | 1.99922  | 5.38331 | 0.01199 | 7.39452  |
| N    | 37 | -0.72730       | 1.99934  | 5.71014 | 0.01781 | 7.72730  |
| O    | 38 | -0.45335       | 1.99975  | 6.44250 | 0.01110 | 8.45335  |



|   |    |          |         |         |         |         |
|---|----|----------|---------|---------|---------|---------|
| O | 39 | -0.45493 | 1.99975 | 6.44407 | 0.01112 | 8.45493 |
| O | 40 | -0.45660 | 1.99975 | 6.44619 | 0.01065 | 8.45660 |
| O | 41 | -0.46172 | 1.99975 | 6.45083 | 0.01114 | 8.46172 |
| O | 42 | -0.45632 | 1.99975 | 6.44551 | 0.01106 | 8.45632 |
| H | 43 | 0.17303  | 0.00000 | 0.82280 | 0.00417 | 0.82697 |
| H | 44 | 0.20707  | 0.00000 | 0.79126 | 0.00167 | 0.79293 |
| H | 45 | 0.19876  | 0.00000 | 0.79810 | 0.00314 | 0.80124 |
| H | 46 | 0.20678  | 0.00000 | 0.79061 | 0.00261 | 0.79322 |
| H | 47 | 0.19132  | 0.00000 | 0.80747 | 0.00122 | 0.80868 |
| H | 48 | 0.20249  | 0.00000 | 0.79552 | 0.00199 | 0.79751 |
| H | 49 | 0.20767  | 0.00000 | 0.79046 | 0.00187 | 0.79233 |
| H | 50 | 0.20614  | 0.00000 | 0.79189 | 0.00197 | 0.79386 |
| H | 51 | 0.20391  | 0.00000 | 0.79409 | 0.00200 | 0.79609 |
| H | 52 | 0.19714  | 0.00000 | 0.80165 | 0.00122 | 0.80286 |
| H | 53 | 0.21499  | 0.00000 | 0.78290 | 0.00211 | 0.78501 |
| H | 54 | 0.20052  | 0.00000 | 0.79739 | 0.00208 | 0.79948 |
| H | 55 | 0.21175  | 0.00000 | 0.78622 | 0.00203 | 0.78825 |
| H | 56 | 0.20262  | 0.00000 | 0.79543 | 0.00195 | 0.79738 |
| H | 57 | 0.21743  | 0.00000 | 0.78103 | 0.00154 | 0.78257 |
| H | 58 | 0.22133  | 0.00000 | 0.77754 | 0.00113 | 0.77867 |
| H | 59 | 0.20098  | 0.00000 | 0.79633 | 0.00268 | 0.79902 |
| H | 60 | 0.20440  | 0.00000 | 0.79434 | 0.00126 | 0.79560 |
| H | 61 | 0.20582  | 0.00000 | 0.79286 | 0.00132 | 0.79418 |
| H | 62 | 0.21459  | 0.00000 | 0.78396 | 0.00146 | 0.78541 |
| H | 63 | 0.20074  | 0.00000 | 0.79657 | 0.00269 | 0.79926 |
| H | 64 | 0.21237  | 0.00000 | 0.78629 | 0.00134 | 0.78763 |
| H | 65 | 0.20063  | 0.00000 | 0.79724 | 0.00213 | 0.79937 |
| H | 66 | 0.22286  | 0.00000 | 0.77584 | 0.00129 | 0.77714 |
| H | 67 | 0.19328  | 0.00000 | 0.80400 | 0.00271 | 0.80672 |
| H | 68 | 0.21420  | 0.00000 | 0.78353 | 0.00228 | 0.78580 |
| H | 69 | 0.20853  | 0.00000 | 0.78776 | 0.00371 | 0.79147 |
| H | 70 | 0.21092  | 0.00000 | 0.78548 | 0.00360 | 0.78908 |
| H | 71 | 0.19372  | 0.00000 | 0.80347 | 0.00281 | 0.80628 |
| H | 72 | 0.20499  | 0.00000 | 0.79169 | 0.00332 | 0.79501 |
| H | 73 | 0.20506  | 0.00000 | 0.79278 | 0.00216 | 0.79494 |
| H | 74 | 0.19875  | 0.00000 | 0.79884 | 0.00241 | 0.80125 |
| H | 75 | 0.19360  | 0.00000 | 0.80432 | 0.00209 | 0.80640 |
| H | 76 | 0.20719  | 0.00000 | 0.79052 | 0.00229 | 0.79281 |
| H | 77 | 0.21027  | 0.00000 | 0.78696 | 0.00277 | 0.78973 |
| H | 78 | 0.19674  | 0.00000 | 0.80073 | 0.00253 | 0.80326 |
| H | 79 | 0.21470  | 0.00000 | 0.78273 | 0.00257 | 0.78530 |
| H | 80 | 0.19792  | 0.00000 | 0.79967 | 0.00241 | 0.80208 |
| H | 81 | 0.19700  | 0.00000 | 0.80096 | 0.00205 | 0.80300 |

\* Total \*    0.00000    125.93265    221.07634    0.99102    348.00000

**Table S3.** The NPA charges of **4** calculated at the B3LYP/6-311G(d,p) level of theory, with the LANL2TZ(f) pseudo-potential applied for the Mo atom.

| Atom | No | Natural Charge | Core     | Valence | Rydberg | Total    |
|------|----|----------------|----------|---------|---------|----------|
| Ge   | 1  | 1.15111        | 28.00000 | 2.83007 | 0.01882 | 30.84889 |
| Mo   | 2  | -2.34130       | 35.94126 | 8.36519 | 0.03485 | 44.34130 |
| C    | 3  | -0.20646       | 1.99909  | 4.17045 | 0.03692 | 6.20646  |
| C    | 4  | -0.18053       | 1.99943  | 4.16426 | 0.01683 | 6.18053  |
| C    | 5  | -0.18014       | 1.99941  | 4.16435 | 0.01638 | 6.18014  |
| C    | 6  | 0.44763        | 1.99903  | 3.52076 | 0.03257 | 5.55237  |
| C    | 7  | -0.06222       | 1.99935  | 4.04957 | 0.01330 | 6.06222  |
| C    | 8  | -0.57118       | 1.99943  | 4.56067 | 0.01108 | 6.57118  |
| C    | 9  | -0.57738       | 1.99944  | 4.56683 | 0.01111 | 6.57738  |
| C    | 10 | -0.58017       | 1.99945  | 4.56820 | 0.01251 | 6.58017  |
| C    | 11 | 0.13044        | 1.99886  | 3.85048 | 0.02021 | 5.86956  |
| C    | 12 | -0.00453       | 1.99906  | 3.99009 | 0.01537 | 6.00453  |
| C    | 13 | -0.59578       | 1.99944  | 4.58727 | 0.00907 | 6.59578  |
| C    | 14 | -0.20921       | 1.99908  | 4.19531 | 0.01482 | 6.20921  |
| C    | 15 | 0.00324        | 1.99917  | 3.98301 | 0.01459 | 5.99676  |
| C    | 16 | -0.59058       | 1.99944  | 4.58230 | 0.00884 | 6.59058  |
| C    | 17 | -0.20831       | 1.99908  | 4.19437 | 0.01486 | 6.20831  |
| C    | 18 | -0.00813       | 1.99906  | 3.99350 | 0.01557 | 6.00813  |
| C    | 19 | -0.59984       | 1.99943  | 4.59125 | 0.00915 | 6.59984  |
| C    | 20 | 0.19587        | 1.99927  | 3.78299 | 0.02187 | 5.80413  |
| C    | 21 | -0.40558       | 1.99934  | 4.38928 | 0.01696 | 6.40558  |
| C    | 22 | -0.19335       | 1.99942  | 4.17704 | 0.01689 | 6.19335  |
| C    | 23 | -0.39054       | 1.99941  | 4.37553 | 0.01561 | 6.39054  |
| C    | 24 | -0.19382       | 1.99942  | 4.17765 | 0.01674 | 6.19382  |
| C    | 25 | -0.41698       | 1.99933  | 4.40160 | 0.01604 | 6.41698  |
| C    | 26 | -0.40762       | 1.99933  | 4.39045 | 0.01785 | 6.40762  |
| C    | 27 | -0.19554       | 1.99941  | 4.17955 | 0.01658 | 6.19554  |
| C    | 28 | -0.38945       | 1.99941  | 4.37449 | 0.01555 | 6.38945  |
| C    | 29 | -0.39492       | 1.99941  | 4.38028 | 0.01523 | 6.39492  |
| C    | 30 | 0.78445        | 1.99918  | 3.15476 | 0.06161 | 5.21555  |
| C    | 31 | 0.78295        | 1.99917  | 3.15617 | 0.06171 | 5.21705  |
| C    | 32 | 0.77871        | 1.99917  | 3.16055 | 0.06157 | 5.22129  |
| C    | 33 | 0.77598        | 1.99917  | 3.16316 | 0.06170 | 5.22402  |
| C    | 34 | 0.77082        | 1.99898  | 3.16771 | 0.06250 | 5.22918  |

|   |    |          |         |         |         |         |
|---|----|----------|---------|---------|---------|---------|
| N | 35 | -0.72126 | 1.99935 | 5.70446 | 0.01746 | 7.72126 |
| N | 36 | -0.39440 | 1.99923 | 5.38328 | 0.01190 | 7.39440 |
| N | 37 | -0.51480 | 1.99931 | 5.49367 | 0.02182 | 7.51480 |
| O | 38 | -0.44799 | 1.99975 | 6.43788 | 0.01037 | 8.44799 |
| O | 39 | -0.44955 | 1.99975 | 6.43937 | 0.01044 | 8.44955 |
| O | 40 | -0.45477 | 1.99975 | 6.44463 | 0.01040 | 8.45477 |
| O | 41 | -0.45156 | 1.99975 | 6.44143 | 0.01039 | 8.45156 |
| O | 42 | -0.45558 | 1.99975 | 6.44555 | 0.01028 | 8.45558 |
| H | 43 | 0.17303  | 0.00000 | 0.82278 | 0.00419 | 0.82697 |
| H | 44 | 0.20716  | 0.00000 | 0.79117 | 0.00167 | 0.79284 |
| H | 45 | 0.19874  | 0.00000 | 0.79816 | 0.00310 | 0.80126 |
| H | 46 | 0.20684  | 0.00000 | 0.79056 | 0.00260 | 0.79316 |
| H | 47 | 0.19131  | 0.00000 | 0.80748 | 0.00121 | 0.80869 |
| H | 48 | 0.20256  | 0.00000 | 0.79545 | 0.00199 | 0.79744 |
| H | 49 | 0.20756  | 0.00000 | 0.79057 | 0.00187 | 0.79244 |
| H | 50 | 0.20607  | 0.00000 | 0.79196 | 0.00197 | 0.79393 |
| H | 51 | 0.20398  | 0.00000 | 0.79402 | 0.00200 | 0.79602 |
| H | 52 | 0.19711  | 0.00000 | 0.80167 | 0.00121 | 0.80289 |
| H | 53 | 0.21486  | 0.00000 | 0.78304 | 0.00210 | 0.78514 |
| H | 54 | 0.20062  | 0.00000 | 0.79729 | 0.00208 | 0.79938 |
| H | 55 | 0.21194  | 0.00000 | 0.78605 | 0.00201 | 0.78806 |
| H | 56 | 0.21189  | 0.00000 | 0.78678 | 0.00134 | 0.78811 |
| H | 57 | 0.20067  | 0.00000 | 0.79719 | 0.00214 | 0.79933 |
| H | 58 | 0.22352  | 0.00000 | 0.77526 | 0.00122 | 0.77648 |
| H | 59 | 0.20089  | 0.00000 | 0.79641 | 0.00270 | 0.79911 |
| H | 60 | 0.21460  | 0.00000 | 0.78394 | 0.00146 | 0.78540 |
| H | 61 | 0.20448  | 0.00000 | 0.79426 | 0.00126 | 0.79552 |
| H | 62 | 0.20588  | 0.00000 | 0.79280 | 0.00132 | 0.79412 |
| H | 63 | 0.20122  | 0.00000 | 0.79608 | 0.00269 | 0.79878 |
| H | 64 | 0.20254  | 0.00000 | 0.79549 | 0.00197 | 0.79746 |
| H | 65 | 0.21608  | 0.00000 | 0.78241 | 0.00151 | 0.78392 |
| H | 66 | 0.22189  | 0.00000 | 0.77701 | 0.00109 | 0.77811 |
| H | 67 | 0.20482  | 0.00000 | 0.79185 | 0.00333 | 0.79518 |
| H | 68 | 0.19412  | 0.00000 | 0.80309 | 0.00279 | 0.80588 |
| H | 69 | 0.20514  | 0.00000 | 0.79270 | 0.00216 | 0.79486 |
| H | 70 | 0.19371  | 0.00000 | 0.80421 | 0.00209 | 0.80629 |
| H | 71 | 0.19884  | 0.00000 | 0.79874 | 0.00241 | 0.80116 |
| H | 72 | 0.20736  | 0.00000 | 0.79032 | 0.00231 | 0.79264 |
| H | 73 | 0.21423  | 0.00000 | 0.78372 | 0.00205 | 0.78577 |
| H | 74 | 0.19344  | 0.00000 | 0.80383 | 0.00273 | 0.80656 |
| H | 75 | 0.20959  | 0.00000 | 0.78645 | 0.00396 | 0.79041 |
| H | 76 | 0.21002  | 0.00000 | 0.78658 | 0.00340 | 0.78998 |
| H | 77 | 0.21519  | 0.00000 | 0.78229 | 0.00253 | 0.78481 |
| H | 78 | 0.19798  | 0.00000 | 0.79961 | 0.00242 | 0.80202 |

|           |    |         |           |           |         |           |
|-----------|----|---------|-----------|-----------|---------|-----------|
| H         | 79 | 0.19698 | 0.00000   | 0.80097   | 0.00205 | 0.80302   |
| H         | 80 | 0.19714 | 0.00000   | 0.80033   | 0.00253 | 0.80286   |
| H         | 81 | 0.20829 | 0.00000   | 0.78906   | 0.00265 | 0.79171   |
| -----     |    |         |           |           |         |           |
| * Total * |    | 0.00000 | 143.91456 | 221.09102 | 0.99442 | 366.00000 |

**Table S4.** The NPA charges of **5** calculated at the B3LYP/6-311G(d,p) level of theory, with the LANL2TZ(f) pseudo-potential applied for the W atom.

| Atom | No | Natural Charge | Core     | Valence | Rydberg | Total    |
|------|----|----------------|----------|---------|---------|----------|
| W    | 1  | -2.18292       | 67.94744 | 8.19983 | 0.03566 | 76.18292 |
| Ge   | 2  | 1.17580        | 28.00000 | 2.80553 | 0.01867 | 30.82420 |
| C    | 3  | 0.74305        | 1.99910  | 3.19460 | 0.06325 | 5.25695  |
| C    | 4  | 0.74476        | 1.99911  | 3.19294 | 0.06319 | 5.25524  |
| C    | 5  | 0.72887        | 1.99887  | 3.20830 | 0.06396 | 5.27113  |
| C    | 6  | 0.73499        | 1.99909  | 3.20265 | 0.06326 | 5.26501  |
| C    | 7  | 0.73775        | 1.99910  | 3.20012 | 0.06303 | 5.26225  |
| C    | 8  | -0.20138       | 1.99907  | 4.16541 | 0.03690 | 6.20138  |
| C    | 9  | -0.18045       | 1.99943  | 4.16418 | 0.01684 | 6.18045  |
| C    | 10 | -0.18009       | 1.99941  | 4.16425 | 0.01643 | 6.18009  |
| C    | 11 | 0.44932        | 1.99904  | 3.51948 | 0.03216 | 5.55068  |
| C    | 12 | -0.06234       | 1.99935  | 4.04969 | 0.01329 | 6.06234  |
| C    | 13 | -0.57118       | 1.99943  | 4.56069 | 0.01107 | 6.57118  |
| C    | 14 | -0.57732       | 1.99944  | 4.56677 | 0.01111 | 6.57732  |
| C    | 15 | -0.58019       | 1.99945  | 4.56821 | 0.01252 | 6.58019  |
| C    | 16 | 0.19570        | 1.99927  | 3.78319 | 0.02185 | 5.80430  |
| C    | 17 | -0.41701       | 1.99933  | 4.40165 | 0.01603 | 6.41701  |
| C    | 18 | -0.40787       | 1.99933  | 4.39058 | 0.01796 | 6.40787  |
| C    | 19 | -0.40571       | 1.99934  | 4.38943 | 0.01695 | 6.40571  |
| C    | 20 | -0.19327       | 1.99942  | 4.17696 | 0.01689 | 6.19327  |
| C    | 21 | -0.39059       | 1.99941  | 4.37557 | 0.01560 | 6.39059  |
| C    | 22 | -0.19374       | 1.99942  | 4.17756 | 0.01676 | 6.19374  |
| C    | 23 | -0.39503       | 1.99941  | 4.38039 | 0.01523 | 6.39503  |
| C    | 24 | -0.19569       | 1.99941  | 4.17967 | 0.01660 | 6.19569  |
| C    | 25 | -0.38948       | 1.99941  | 4.37452 | 0.01554 | 6.38948  |
| C    | 26 | 0.12911        | 1.99886  | 3.85166 | 0.02036 | 5.87089  |
| C    | 27 | -0.00451       | 1.99906  | 3.98992 | 0.01553 | 6.00451  |
| C    | 28 | -0.59567       | 1.99944  | 4.58712 | 0.00911 | 6.59567  |
| C    | 29 | -0.20871       | 1.99908  | 4.19481 | 0.01482 | 6.20871  |
| C    | 30 | 0.00413        | 1.99917  | 3.98213 | 0.01457 | 5.99587  |

|   |    |          |         |         |         |         |
|---|----|----------|---------|---------|---------|---------|
| C | 31 | -0.59067 | 1.99944 | 4.58239 | 0.00885 | 6.59067 |
| C | 32 | -0.20764 | 1.99908 | 4.19369 | 0.01487 | 6.20764 |
| C | 33 | -0.00785 | 1.99906 | 3.99305 | 0.01575 | 6.00785 |
| C | 34 | -0.60016 | 1.99943 | 4.59154 | 0.00918 | 6.60016 |
| N | 35 | -0.51382 | 1.99931 | 5.49255 | 0.02196 | 7.51382 |
| N | 36 | -0.39312 | 1.99923 | 5.38210 | 0.01180 | 7.39312 |
| N | 37 | -0.71935 | 1.99934 | 5.70289 | 0.01712 | 7.71935 |
| O | 38 | -0.44863 | 1.99975 | 6.43777 | 0.01112 | 8.44863 |
| O | 39 | -0.44658 | 1.99975 | 6.43582 | 0.01102 | 8.44658 |
| O | 40 | -0.45564 | 1.99975 | 6.44516 | 0.01073 | 8.45564 |
| O | 41 | -0.45062 | 1.99975 | 6.43977 | 0.01110 | 8.45062 |
| O | 42 | -0.45420 | 1.99975 | 6.44335 | 0.01110 | 8.45420 |
| H | 43 | 0.17340  | 0.00000 | 0.82246 | 0.00414 | 0.82660 |
| H | 44 | 0.20767  | 0.00000 | 0.79067 | 0.00166 | 0.79233 |
| H | 45 | 0.19911  | 0.00000 | 0.79780 | 0.00309 | 0.80089 |
| H | 46 | 0.20724  | 0.00000 | 0.79016 | 0.00260 | 0.79276 |
| H | 47 | 0.20776  | 0.00000 | 0.79037 | 0.00186 | 0.79224 |
| H | 48 | 0.19127  | 0.00000 | 0.80753 | 0.00121 | 0.80873 |
| H | 49 | 0.20287  | 0.00000 | 0.79515 | 0.00198 | 0.79713 |
| H | 50 | 0.19709  | 0.00000 | 0.80169 | 0.00121 | 0.80291 |
| H | 51 | 0.20622  | 0.00000 | 0.79182 | 0.00196 | 0.79378 |
| H | 52 | 0.20426  | 0.00000 | 0.79375 | 0.00200 | 0.79574 |
| H | 53 | 0.20084  | 0.00000 | 0.79708 | 0.00208 | 0.79916 |
| H | 54 | 0.21214  | 0.00000 | 0.78585 | 0.00201 | 0.78786 |
| H | 55 | 0.21496  | 0.00000 | 0.78294 | 0.00210 | 0.78504 |
| H | 56 | 0.19345  | 0.00000 | 0.80382 | 0.00273 | 0.80655 |
| H | 57 | 0.21411  | 0.00000 | 0.78378 | 0.00211 | 0.78589 |
| H | 58 | 0.20905  | 0.00000 | 0.78670 | 0.00425 | 0.79095 |
| H | 59 | 0.21002  | 0.00000 | 0.78663 | 0.00335 | 0.78998 |
| H | 60 | 0.19412  | 0.00000 | 0.80309 | 0.00279 | 0.80588 |
| H | 61 | 0.20479  | 0.00000 | 0.79189 | 0.00331 | 0.79521 |
| H | 62 | 0.20518  | 0.00000 | 0.79266 | 0.00216 | 0.79482 |
| H | 63 | 0.19901  | 0.00000 | 0.79858 | 0.00241 | 0.80099 |
| H | 64 | 0.19364  | 0.00000 | 0.80427 | 0.00209 | 0.80636 |
| H | 65 | 0.20767  | 0.00000 | 0.79002 | 0.00231 | 0.79233 |
| H | 66 | 0.20870  | 0.00000 | 0.78851 | 0.00279 | 0.79130 |
| H | 67 | 0.19721  | 0.00000 | 0.80025 | 0.00253 | 0.80279 |
| H | 68 | 0.21587  | 0.00000 | 0.78160 | 0.00252 | 0.78413 |
| H | 69 | 0.19692  | 0.00000 | 0.80103 | 0.00205 | 0.80308 |
| H | 70 | 0.19813  | 0.00000 | 0.79946 | 0.00241 | 0.80187 |
| H | 71 | 0.20067  | 0.00000 | 0.79721 | 0.00212 | 0.79933 |
| H | 72 | 0.22280  | 0.00000 | 0.77599 | 0.00121 | 0.77720 |
| H | 73 | 0.21267  | 0.00000 | 0.78599 | 0.00134 | 0.78733 |
| H | 74 | 0.20112  | 0.00000 | 0.79618 | 0.00270 | 0.79888 |

|           |    |         |           |           |         |           |
|-----------|----|---------|-----------|-----------|---------|-----------|
| H         | 75 | 0.20459 | 0.00000   | 0.79415   | 0.00126 | 0.79541   |
| H         | 76 | 0.20590 | 0.00000   | 0.79278   | 0.00132 | 0.79410   |
| H         | 77 | 0.21498 | 0.00000   | 0.78355   | 0.00146 | 0.78502   |
| H         | 78 | 0.20151 | 0.00000   | 0.79580   | 0.00269 | 0.79849   |
| H         | 79 | 0.21721 | 0.00000   | 0.78125   | 0.00154 | 0.78279   |
| H         | 80 | 0.22104 | 0.00000   | 0.77788   | 0.00108 | 0.77896   |
| H         | 81 | 0.20276 | 0.00000   | 0.79529   | 0.00195 | 0.79724   |
| =====     |    |         |           |           |         |           |
| * Total * |    | 0.00000 | 175.92034 | 221.07352 | 1.00614 | 398.00000 |

## 6. References

- [S1] B. Su, R. Ganguly, Y. Li, R. Kinjo, *Angew. Chem., Int. Ed.*, 2014, **53**, 13106.
- [S2] W. Strohmeier, *Angew. Chem., Int. Ed.*, 1964, **3**, 730.
- [S3] Bruker AXS SHELXTL, Madison, WI; *SHELX-97G*. M. Sheldrick, *Acta Crystallogr. A*, **2008**, *64*, 112–122, *SHELX-2013*, <http://shelx.uni-ac.gwdg.de/SHELX/index.php>.
- [S4] Gaussian 09, Revision B.01, M. J. Frisch, G. W. Trucks, H. B. Schlegel, G. E. Scuseria, M. A. Robb, J. R. Cheeseman, G. Scalmani, V. Barone, B. Mennucci, G. A. Petersson, H. Nakatsuji, M. Caricato, X. Li, H. P. Hratchian, A. F. Izmaylov, J. Bloino, G. Zheng, J. L. Sonnenberg, M. Hada, M. Ehara, K. Toyota, R. Fukuda, J. Hasegawa, M. Ishida, T. Nakajima, Y. Honda, O. Kitao, H. Nakai, T. Vreven, J. A. Montgomery, Jr., J. E. Peralta, F. Ogliaro, M. Bearpark, J. J. Heyd, E. Brothers, K. N. Kudin, V. N. Staroverov, T. Keith, R. Kobayashi, J. Normand, K. Raghavachari, A. Rendell, J. C. Burant, S. S. Iyengar, J. Tomasi, M. Cossi, N. Rega, J. M. Millam, M. Klene, J. E. Knox, J. B. Cross, V. Bakken, C. Adamo, J. Jaramillo, R. Gomperts, R. E. Stratmann, O. Yazyev, A. J. Austin, R. Cammi, C. Pomelli, J. W. Ochterski, R. L. Martin, K. Morokuma, V. G. Zakrzewski, G. A. Voth, P. Salvador, J. J. Dannenberg, S. Dapprich, A. D. Daniels, O. Farkas, J. B. Foresman, J. V. Ortiz, J. Cioslowski, D. J. Fox, Gaussian, Inc., Wallingford CT, **2010**.
